1 RESEARCH ARTICLE

2

3 **Adult Plant Resistance in Maize to Northern Leaf Spot Is a Feature of Partial Loss-**  
4 **of-function Alleles of *Hm1***

5

6 **Sandeep R. Marla<sup>1,a</sup>, Kevin Chu<sup>1,b</sup>, Satya Chintamanani<sup>1,c</sup>, Dilbag Multani<sup>2</sup>, Antje**  
7 **Klempien<sup>1,d</sup>, Alyssa DeLeon<sup>1,e</sup>, Kim Bong-suk<sup>1</sup>, Larry D. Dunkle<sup>1</sup>, Brian P. Dilkes<sup>3</sup>,**  
8 **Gurmukh S. Johal<sup>1\*</sup>**

9

10 <sup>1</sup>Department of Botany and Plant Pathology, Purdue University, West Lafayette, IN  
11 47907

12 <sup>2</sup>DowDuPont, Johnston, IA 50131

13 <sup>3</sup>Department of Biochemistry, Purdue University, West Lafayette, IN 47907

14

15 <sup>a</sup>Present address: Department of Agronomy, Kansas State University, Manhattan, KS  
16 66506

17 <sup>b</sup>Present address: Donald Danforth Plant Science Center, St. Louis, MO 63132

18 <sup>c</sup>Present address: Syngenta, Slater, IA 50244

19 <sup>d</sup>Present address: KeyGene USA, Rockville, MD 20850

20 <sup>e</sup>Present address: DowDuPont, Johnston, IA 50131

21

22

23

24

25 **\*Corresponding Author:** [gjohal@purdue.edu](mailto:gjohal@purdue.edu)

26

27

28

29

30

31 **Short title:** A causal link between weak resistance and APR in maize

32

33 **One sentence summary:** Characterization of adult plant resistance in the maize-CCR1  
34 pathosystem reveals a causal link between weak resistance and APR.

35

36

## 37 ABSTRACT

38 Adult plant resistance (APR) is an enigmatic phenomenon in which resistance genes are  
39 ineffective in protecting seedlings from disease but confer robust resistance at maturity.  
40 Maize has multiple examples in which genes confer APR to northern leaf spot, a lethal  
41 disease caused by *Cochliobolus carbonum* race 1 (CCR1). The first identified case of  
42 APR in maize is encoded by a hypomorphic allele, *Hm1<sup>A</sup>*, at the *hm1* locus. In contrast,  
43 wild type alleles of *hm1* provide complete protection at all developmental stages and in  
44 every part of the maize plant. *Hm1* encodes an NADPH-dependent reductase, which  
45 inactivates HC-toxin, a key virulence effector of CCR1. Cloning and characterization of  
46 *Hm1<sup>A</sup>* ruled out differential transcription or translation for its APR phenotype and  
47 identified an amino acid substitution that reduced HC-toxin reductase (HCTR) activity.  
48 The possibility of a causal relationship between the weak nature of *Hm1<sup>A</sup>* and its APR  
49 phenotype was confirmed by the generation of two new APR alleles of *Hm1* by  
50 mutagenesis. The HCTRs encoded by these new APR alleles had undergone relatively  
51 conservative missense changes that partially reduced their enzymatic activity similar to  
52 *Hm1<sup>A</sup>*. No difference in accumulation of HCTR was observed between adult and juvenile  
53 plants, suggesting that the susceptibility of seedlings derives from a greater need for  
54 HCTR activity, not reduced accumulation of the gene product. Conditions and treatments  
55 that altered the photosynthetic output of the host had a dramatic effect on resistance  
56 imparted by the APR alleles, demonstrating a link between the energetic or metabolic  
57 status of the host and disease resistance affected by HC-toxin catabolism by the APR  
58 alleles of HCTR.

## 59 INTRODUCTION

60 Plant responses to pathogens are dynamic, and they involve a number of inducible  
61 mechanisms that are tightly regulated both in space and time (Johal et al., 1995). They are  
62 called into action only at the time and site of infection. The tight regulation of innate  
63 immunity is due to disease resistance (DR) genes that plants inherit from their parents  
64 and which often segregate with the trait of resistance (Johal et al., 1995; Jones and Dangl,  
65 2006; Jones et al., 2016). A vast majority of these DR genes function in every part of the  
66 plant and at every stage of development. However, many exceptions exist where  
67 resistance is manifested in a tissue- or developmental stage-specific manner. In most  
68 instances of developmentally regulated resistance, plants are susceptible at the seedling  
69 stage but become increasingly resistant toward maturity. The term commonly used to  
70 define such developmentally regulated resistance is adult plant resistance (APR),  
71 although other terms such as age-associated resistance, ontogenic resistance, mature plant  
72 resistance, or flowering-induced resistance have also been used in the literature to  
73 describe the same phenomenon (Dyck et al., 1966; Kus et al., 2002; Panter and Jones,  
74 2002; Whalen, 2005; Develey-Rivière and Galiana, 2007).

75           Adult plant resistance (APR) often manifests gradually with the advancement of  
76 plant age, but a few cases have been reported where the onset is abrupt, happening  
77 sharply at a certain stage of development (Nelson and Ullstrup, 1964; Jones and Hayes,  
78 1971; Abedon and Tracy, 1996; Chintamanani et al., 2008). An example of the latter kind  
79 is the wheat *Lr34* gene-mediated resistance, in which the onset against the leaf rust  
80 pathogen, *Puccinia triticina*, is largely confined to the uppermost leaf (flag leaf)  
81 (Krattinger et al., 2009). In contrast, in the rice-*Xanthomonas oryzae* pv. *oryzae*  
82 pathosystem, resistance conferred by the *Xa21* gene is almost negligible during the first  
83 three weeks of age but then increases steadily each week, reaching full efficacy at  
84 maturity (Song et al., 1995; Century et al., 1999). Similarly, the *Yr36*-conferred resistance  
85 in wheat to *Puccinia striiformis* (Fu et al., 2009) and the *Hm2*-conferred resistance in  
86 maize to *Cochliobolus carbonum* race 1 (CCR1) increase gradually with plant age  
87 (Chintamanani et al., 2008).

88           In efforts to understand the mechanistic basis of APR, several genes conferring  
89 this form of resistance were isolated in different pathosystems. Some of these genes  
90 include *Cf-9B* from tomato conferring resistance to leaf mold (Panter et al., 2002), *Mi-1*  
91 from tomato conferring resistance to aphids (Milligan et al., 1998), *Xa21* from rice  
92 conferring resistance to leaf blight (Song et al., 1995), *Lr67* and *Lr34* from wheat  
93 conferring resistance to leaf rust (Krattinger et al., 2009; Moore et al., 2015), *Yr36* from  
94 wheat conferring resistance to stripe rust (Fu et al., 2009), and *Hm2* from maize  
95 conferring resistance to leaf blight (Chintamanani et al., 2008). Two of these genes, *Cf-9*  
96 and *Mi-1*, clearly follow the gene-for-gene (GFG) paradigm in conferring resistance,  
97 while four others, *Lr67*, *Lr34*, *Yr36* and *Hm2*, do not, suggesting that any disease  
98 resistance gene has the potential to confer an APR phenotype.

99           What makes a gene behave in an APR manner? This question still eludes us, even  
100 though a number of APR genes, including those described in the preceding paragraph,  
101 have been cloned and characterized. One logical expectation was that the phenotype of  
102 APR genes may derive from their differential expression at different stages of plant  
103 development and that the level of gene expression would match their phenotypic efficacy  
104 closely. However, this has been ruled out with the majority of the APR genes, as their  
105 transcript levels do not reflect changes in their resistance phenotype (Century et al., 1999;

106 Panter et al., 2002; McDowell et al., 2005; Chintamanani et al., 2008; Krattinger et al.,  
107 2009). Other possibilities that may affect the APR behavior of these genes are differential  
108 translation, differential post-translational modifications, and developmental changes in  
109 plant physiology and metabolism.

110 To gain insight into the mechanistic basis of APR in maize, we have been  
111 studying the northern leaf spot (NLS) disease of maize (*Zea mays*) caused by *C.*  
112 *carbonum* race 1. A classic APR syndrome is described in this pathosystem where alleles  
113 at two homeologous loci can confer resistance in a developmentally programmed fashion  
114 (Nelson and Ullstrup, 1964). These duplicate genes, *Hm1* and *Hm2*, encode NADPH-  
115 dependent HC-toxin reductases (HCTR), which utilize NADPH as a cofactor to reduce an  
116 essential ketone function in HC-toxin (HCT), the key disease causing effector of CCR1,  
117 and abolish its activity (Kim et al., 1987; Meeley et al., 1992; Johal and Briggs, 1992).  
118 There is one prominent difference between the HCTRs encoded by *hm1* and *hm2*:  
119 whereas the HCTR encoded by wild type (WT) *Hm1* contains 356 amino acids, the  
120 HCTR encoded by the functional *Hm2* allele is truncated and lacks the last 52 amino  
121 acids compared to HM1 (Chintamanani et al., 2008). This truncated allele is the only  
122 functional allele that has been identified at *hm2*, and it confers APR against CCR1 when  
123 *hm1* is null. *Hm2* is expressed throughout the age of the plant (Chintamanani et al.,  
124 2008), ruling out developmentally regulated transcript accumulation as the mechanism of  
125 APR. Like *Hm2*, an allele of *hm1* conferring APR has also been described (Nelson and  
126 Ullstrup, 1964). Designated *Hm1<sup>A</sup>*, this APR allele is recessive to the WT *Hm1* allele and  
127 dominant to the *hm1* null allele (Nelson and Ullstrup, 1964).

128 To explore why and how the *Hm1<sup>A</sup>* allele leads to an APR phenotype, we have  
129 cloned and characterized it in detail. Comparison of the sequence of *Hm1<sup>A</sup>* with those of  
130 the WT haplotypes from a number of resistant inbreds and accessions revealed a single  
131 amino acid substitution in the HM1<sup>A</sup> peptide that is unique to its APR behavior. HM1<sup>A</sup>  
132 transcripts accumulated to similar levels throughout plant growth and development.  
133 However, the HCTR activity in *Hm1<sup>A</sup>* plants was intermediate between WT (*Hm1Hm1*)  
134 and null mutant (*hm1hm1hm2hm2*) plants. This, along with the truncated nature of the  
135 APR allele at *hm2*, prompted us to consider if the hypomorphic *Hm1* allele in *Hm1<sup>A</sup>* was  
136 the reason for its APR phenotype. This hypothesis was addressed by mutagenesis,



137 generating two new APR mutants of the B73 maize inbred, which is homozygous for the  
138 WT allele at *hm1* and the null allele at *hm2* (*Hm1Hm1hm2hm2*). Both new APR alleles  
139 were found to contain single amino acid substitutions in HM1-B73 and reduced HCTR  
140 activity. Thus, APR is a symptom of partial loss-of-function mutations in *Hm1* that result  
141 in seedling susceptibility.

## 142 RESULTS

### 143 Detailed genetics of APR-conferring *Hm1<sup>A</sup>* as an allele of *hm1*

144 The APR trait attributed to *Hm1<sup>A</sup>* was first noticed in the inbred P8, developed at Purdue  
145 University in the early 1960s (Nelson and Ullstrup, 1964). The genetic evidence linking  
146 the APR of P8 with an allele of *hm1* (*Hm1<sup>A</sup>*) made use of two segregating populations, a  
147 testcross and an F<sub>2</sub> population, generated by crossing P8 (*Hm1<sup>A</sup>Hm1<sup>A</sup>hm2hm2*) with the  
148 resistant inbred WF9 (*Hm1Hm1Hm2Hm2*). The susceptible inbred for the testcross was  
149 Pr, which is homozygous for null mutations at both the *hm1* and *hm2* loci. There were at  
150 least two concerns with this study. First, it used a relatively small number of progenies,  
151 comprising about 90 plants each for both the F<sub>2</sub> and testcross populations. Second, the  
152 resistant inbred WF9 also contained an APR allele at the *hm2* locus, leaving room for  
153 error in extrapolation from these data.

154 These concerns necessitated that we revisit these findings, to clone and  
155 characterize *Hm1<sup>A</sup>*. We acquired P8 from the Germplasm Resources Information  
156 Network (GRIN). To confirm that this source of P8 harbored the *Hm1<sup>A</sup>* allele reported by  
157 Nelson and Ullstrup (1964), we conducted a thorough analysis of the genetics of P8  
158 resistance to CCR1. We first crossed P8 twice with Pr (*hm1hm1hm2hm2*) to produce a  
159 BC<sub>1</sub>F<sub>1</sub> testcross population. Of 384 BC<sub>1</sub>F<sub>1</sub> plants inoculated with CCR1, 186 plants were  
160 susceptible at both the seedling and adult stage while 198 plants were susceptible as  
161 seedlings, but later emerging leaves were fully resistant, consistent with the APR  
162 phenotype of P8. The recessive null *hm1* allele of Pr (designated as *hm1<sup>Pr</sup>*) contains a  
163 256-bp *Drone* transposon insertion in exon 4 (Multani et al., 1998). All 186 plants  
164 susceptible at maturity were homozygous for *hm1<sup>Pr</sup>*, whereas all 198 plants that were  
165 initially susceptible and then displayed APR were heterozygous for *hm1<sup>Pr</sup>*. This 1:1 ratio  
166 of susceptible vs. APR plants ( $\chi^2 = 0.375$ ,  $P > 0.05$ , 1 d.f.) indicated that a single gene at  
167 or near the *hm1* locus controlled the APR behavior of P8.

168           Next we crossed P8 to Pr1, a near isogenic line (NIL) of Pr in which the mutant  
169 *hml* allele was replaced by a WT *Hm1* (Ullstrup, 1944). The resulting *Hm1<sup>A</sup>Hm1* F<sub>1</sub>  
170 hybrid was testcrossed to Pr, the *hmlhm2* null stock. The inheritance of *Hm1<sup>Pr1</sup>* vs. *Hm1<sup>A</sup>*  
171 in this population was tracked with a PCR-based marker that differentiated between those  
172 two alleles. Of the 540 F<sub>1</sub> test cross progeny, 276 were susceptible as seedlings and later  
173 exhibited APR, while the remaining 264 were completely resistant to CCR1 regardless of  
174 age. All 264 completely resistant plants had inherited the WT *Hm1* allele from Pr1, while  
175 the 274 plants that exhibited APR had inherited the *Hm1<sup>A</sup>* allele from P8. Chi-squared  
176 tests supported the 1:1 expected inheritance of monogenic inheritance ( $X^2 = 0.266667$ ,  $P >$   
177  $0.05$ , 1 d.f.). No recombinants between the genotypes at the *hml* locus and the expression  
178 of CCR1 susceptibility were found in either population (924 opportunities for crossover).  
179 This confirmed that the source of P8 we obtained recapitulated the phenomenon  
180 described in 1964 (Nelson and Ullstrup, 1964) and that the APR of P8 is likely conferred  
181 by the *Hm1<sup>A</sup>* allele.

182           To incorporate *Hm1<sup>A</sup>* into a uniform background for detailed phenotypic  
183 comparisons, we introgressed this APR allele into the B73 inbred by crossing P8  
184 (*Hm1<sup>A</sup>Hm1<sup>A</sup> hm2hm2*) to B73 (*Hm1Hm1hm2hm2*). As *Hm1<sup>A</sup>* is recessive to WT *Hm1*, we  
185 utilized sequence polymorphism between *Hm1<sup>A</sup>* and *Hm1<sup>B73</sup>* to construct a PCR-based  
186 marker. After seven crosses to B73 with selection for the *Hm1<sup>A</sup>* genotype, BC<sub>7</sub>F<sub>2</sub> progeny  
187 were generated by self-pollinating a heterozygous plant. This BC<sub>7</sub>F<sub>2</sub> population  
188 segregated in a 3:1 ratio for complete resistance and APR, again consistent with *Hm1<sup>A</sup>*  
189 being responsible for APR of P8. Homozygous *Hm1<sup>A</sup>* plants from this population were  
190 selected and maintained as an *Hm1<sup>A</sup>* near-isogenic line in B73.

### 191 **Phenotypic manifestation of adult plant resistance in maize to CCR1**

192           To develop a comprehensive account of the onset of APR by *Hm1<sup>A</sup>*, we also introgressed  
193 the null *hml<sup>Pr</sup>* allele into the B73 background over seven generations, and crossed with  
194 *Hm1<sup>A</sup>* B73 NIL to generate plants heterozygous for *Hm1<sup>A</sup>*. Both homozygous  
195 (*Hm1<sup>A</sup>Hm1<sup>A</sup>*) and heterozygous (*Hm1<sup>A</sup>hml<sup>Pr</sup>*) *Hm1<sup>A</sup>* plants were inoculated with CCR1 at  
196 weekly intervals, starting at 1 week-after-planting (wap) and culminating at 10 wap.  
197 Their infection phenotypes were measured using a 1-10 disease rating scale  
198 (Chintamanani et al., 2008) and compared with those of B73 and a B73 NIL containing

199 the null *hm1* allele (*hm1<sup>Pr</sup>* B73 NIL). A rating of 10 on this scale indicated highly  
200 susceptible plants, while a rating of 1 indicated complete resistance.

201 The susceptible *hm1<sup>Pr</sup>* B73 NILs scored 10 on the disease rating scale regardless  
202 of age, and the resistant controls (B73 inbred), which produced small chlorotic flecks in  
203 response to CCR1 infection, scored 1 throughout development. Plants containing *Hm1<sup>A</sup>*  
204 exhibited very little resistance at the seedling stage, but severity scores decreased with  
205 age (Fig. 1A and 1C). At the age of week-1, *Hm1<sup>A</sup>* seedlings were consistently rated 8 or  
206 higher. This disease rating dropped to 5 or less by week-5. At week-10, *Hm1<sup>A</sup>* plants  
207 resembled the resistant controls, receiving a rating of 1 (Fig. 1B and 1C). The level of  
208 resistance conferred by *Hm1<sup>A</sup>* correlated with the age of the whole plant at the time of  
209 inoculation and not the age of the inoculated leaf. Inoculating each leaf of *Hm1<sup>A</sup>Hm1<sup>A</sup>*  
210 and *hm1hm1* plants at week-5 of plant growth confirmed this observation. All the leaves  
211 of *Hm1<sup>A</sup>* plants were equally resistant regardless of their age, and all the leaves of  
212 *hm1hm1* plants were equally susceptible (data not shown).

213 Similar to the APR conferred by the *Hm2* gene (Chintamanani et al., 2008), the  
214 resistance conferred by *Hm1<sup>A</sup>* was dosage dependent. Plants homozygous for *Hm1<sup>A</sup>* were  
215 slightly more resistant to CCR1 at almost all stages of development compared to plants  
216 heterozygous for *Hm1<sup>A</sup>* and the null allele (*Hm1<sup>A</sup>hm1<sup>Pr</sup>*) indicating that *Hm1<sup>A</sup>* is  
217 haploinsufficient (Fig. 1C). The dosage effect was more pronounced at week-5 and  
218 declined after week-7 as the plants matured and became completely resistant.

### 219 **Molecular characterization of the *Hm1<sup>A</sup>* allele**

220 Atypical behavior of a disease resistance gene can sometimes result from complex  
221 structural changes at the locus, such as an increase in the copy number of the gene or a  
222 part of the gene (Piffanelli et al., 2004; Cook et al., 2012). To address if such a genetic  
223 mechanism also led to the *Hm1<sup>A</sup>* APR, we conducted a Southern blot analysis with P8  
224 DNA digested with a variety of restriction enzymes. Consistent with the genetic data, a  
225 single *BamHI* restriction fragment hybridized to *Hm1*-specific probes on these blots,  
226 indicating that *Hm1<sup>A</sup>* was a single copy gene in the P8 inbred and that the entire gene was  
227 present on a 13 kb restriction fragment (Fig. 2A). To clone the *Hm1<sup>A</sup>* gene, a lambda  
228 library was constructed from the *BamHI*-digested P8 DNA restriction fragments  
229 migrating on a gel as 12 to 15 kb fragments. We identified and sequenced a clone

230 containing the 13 kb *hm1*-encoding fragment. Sequence analysis indicated that our clone  
231 contained the entire coding region of the *Hm1* gene, as well as 3.8 kb of the promoter  
232 region.

233 To determine the structural changes in *Hm1<sup>A</sup>*, its sequence was compared with  
234 that of the B73 reference sequence. Significant changes were encountered in the promoter  
235 regions of *Hm1<sup>A</sup>* and *Hm1<sup>B73</sup>*. Except for a few indels and SNPs, the first -200 bp from  
236 the translation start site of the promoter region are similar in *Hm1<sup>A</sup>* and B73 (Fig. S1).  
237 The next -1.5 kb region upstream, however, is completely different between the two  
238 alleles, though this does not seem to be due to the insertion of a transposable element.  
239 Interestingly, the promoter region of *Hm1<sup>A</sup>* is identical to that of *hm1<sup>Pr</sup>*, the null *hm1*  
240 allele from the susceptible inbred Pr. To examine if any other resistant lines containing a  
241 wild type *Hm1* allele also had a promoter region identical to that of *Hm1<sup>A</sup>*, we used a  
242 primer pair designed from the *Hm1<sup>A</sup>* promoter region to PCR amplify DNA from a  
243 number of resistant inbreds. Two inbreds, Pr1 and Va35, were found whose *Hm1* WT  
244 alleles have the promoter regions identical to that of *Hm1<sup>A</sup>* (Fig. S1). Taken together,  
245 these results indicate that the promoter polymorphism between *Hm1<sup>A</sup>* and *Hm1<sup>B73</sup>*  
246 predicted neither resistance nor susceptibility and thus may be inconsequential to the  
247 APR phenotype of *Hm1<sup>A</sup>*.

248 The coding region of *Hm1<sup>A</sup>* also differed from that of *Hm1<sup>B73</sup>*, containing nine  
249 SNPs. Although four of these SNPs were silent or synonymous, five led to amino acid  
250 substitutions in the predicted HM1<sup>A</sup> peptide (Fig. 2B). Relative to the B73 HM1  
251 reference, these substitutions were: a Serine to Tyrosine change at residue 99 (S99Y), an  
252 Aspartic acid to Tyrosine change at residue 110 (D110Y), a Leucine to Histidine change  
253 at residue 116 (L116H), a Serine to Asparagine change at residue 191 (S191N), and a  
254 Leucine to Proline change at residue 240 (L240P) (Fig. 2B).

### 255 **The L116H substitution is the likely causative polymorphism in the *Hm1<sup>A</sup>* allele**

256 As *Hm1* is one of the most polymorphic genes in maize (Zhang et al., 2002), we decided  
257 to examine the peptide sequence of various resistance alleles to potentially pinpoint the  
258 amino acid change(s) responsible for the APR behavior of *Hm1<sup>A</sup>*. We first amplified and  
259 evaluated the HM1 sequences of Pr1 and Va35, the two resistant inbreds that share their  
260 promoters with *Hm1<sup>A</sup>*, and compared them with the sequences of both HM1<sup>A</sup> and

261 HM1<sup>B73</sup>. HM1<sup>Pr1</sup> was found to differ by five amino acids from HM1<sup>B73</sup>, with two of these  
262 polymorphisms, S99Y and L240P, also being present in HM1<sup>A</sup> (Fig. S2). These same two  
263 changes were also found in HM1<sup>Va35</sup>, which differed from HM1<sup>B73</sup> by six amino acids.  
264 Another resistant *Hm1* allele that differed from B73 by six amino acids was in the inbred  
265 W22, but none of those changes matched those of HM1<sup>A</sup>. However, the predicted HM1  
266 of the landrace Enano from Bolivia (Zhang et al., 2002) shared with HM1<sup>A</sup> the two  
267 polymorphisms D110Y and S191N. And most importantly, the HM1 of the landrace Pira  
268 from Colombia (Zhang et al., 2002) shared four of the five amino acid changes between  
269 HM1<sup>A</sup> and HM1<sup>B73</sup>. These are S99Y, D110Y, S191N, and L240P, thereby leaving only  
270 the L116H polymorphism unique to HM1<sup>A</sup>.

271 To examine the functional status of the *Hm1* allele of Pira, we acquired this  
272 landrace from GRIN and inoculated it with CCR1. It was found to be completely resistant  
273 to CCR1, even at the seedling stage. This demonstrated that despite having four of the  
274 five amino acid changes of HM1<sup>A</sup>, the *Hm1*<sup>Pira</sup> allele is fully functional and not APR.  
275 These results highlight the importance of the L116H substitution in defining the  
276 phenotype of *Hm1*<sup>A</sup>. Consistent with this hypothesis, the Leucine at 116 is highly  
277 conserved not only in all the homoeologs and orthologs of the *Hm1* gene across the grass  
278 lineage, but also in the maize dihydroflavonol 4-reductase (DFR), an NADPH-dependent  
279 enzyme of the anthocyanin pathway predicted to be a progenitor of HM1 (Fig. S2). All  
280 these findings suggest that the HM1<sup>A</sup> L116H substitution is unique to *Hm1*<sup>A</sup> and may  
281 underlie its APR behavior to CCR1 in maize by somehow negatively impacting HCTR  
282 activity.

### 283 **HM1 transcript accumulation is not developmentally regulated in *Hm1*<sup>A</sup>**

284 To examine if the transcriptional activity of *Hm1*<sup>A</sup> undergoes any change during plant  
285 development, reverse transcription (RT)-PCR was conducted on RNA extracted from  
286 CCR1-inoculated *Hm1*<sup>A</sup> plants of diverse ages. Using a semi-quantitative form of this  
287 assay, no dramatic changes could be observed in the level of the *Hm1*<sup>A</sup> transcript between  
288 the seedling and mature-plant stages (Fig. 3A). Likewise, quantitative real time PCR  
289 (qRT-PCR) measurements of transcript abundance of *Hm1*<sup>A</sup> plants inoculated with CCR1  
290 at different ages did not detect any rise in HM1 expression as the susceptible plants

291 became resistant over time (Fig. 3B). These results ruled out the differential transcription  
292 of the *Hm1<sup>A</sup>* allele as the basis for its APR phenotype.

### 293 **The level of *Hm1<sup>A</sup>*-encoded functional HCTR does not change during plant** 294 **development**

295 In an attempt to address if the translational activity of HM1<sup>A</sup> had any impact on its APR  
296 behavior, two antibodies using different parts of the predicted HM1<sup>A</sup> peptide were  
297 generated. Neither, however, turned out to be HM1- or HM1<sup>A</sup>-specific, potentially due to  
298 cross-reaction with two other loci in maize that share high sequence identity to the *hml*  
299 locus (Sindhu et al., 2008). This necessitated the development of an alternative method to  
300 examine *Hm1<sup>A</sup>* accumulation. Rather than focus on protein accumulation, we developed  
301 an LC-MS/MS-based *in vitro* HCTR activity assay that quantified the reduction of HC-  
302 toxin by crude protein extracts. The *in vitro* measurements were normalized to total  
303 protein content, allowing us to estimate the level of the functional HCTR in plant tissues.  
304 To examine the level of HCTR over time, proteins were extracted from CCR1-inoculated  
305 leaves of 3- and 7-week-old plants of *Hm1<sup>A</sup>* and control stocks, and their HCTR activity  
306 was measured in replicated samples. Two trends were noted as shown in Fig. 3C. First,  
307 the HCTR activity encoded by HM1<sup>A</sup> was lower than by the WT allele but not null as  
308 that of *hml<sup>Pr</sup>*. At both stages of development, the HCTR activity of HM1<sup>A</sup> was about 3-  
309 fold lower than that of HM1. Second, the level of active HCTR differed little if any in 3-  
310 or 7-week *Hm1<sup>A</sup>* plants (Fig. 3C). Likewise, the HCTR activity of the WT allele also did  
311 not differ between week-3 and week-7-old plants (Fig. 3C). Two conclusions can be  
312 drawn from these results. First, *Hm1<sup>A</sup>* encodes an HCTR that is relatively weaker than the  
313 enzyme encoded by the WT allele. Second, the level of the active HCTR stays constant  
314 over development and does not account for the APR phenotype of *Hm1<sup>A</sup>*.

### 315 **Partial loss-of-function mutations confer adult plant resistance in the maize-CCR1** 316 **pathosystem**

317 What aspect of the *Hm1<sup>A</sup>* gene structure or function restricts it to be an APR gene, i.e.,  
318 conferring resistance only at the mature-plant stage but not the seedling stage? Having  
319 ruled out differential transcription or translation as possible mechanisms, we paid  
320 attention to an attribute of *Hm1<sup>A</sup>* that differentiates it from both the WT and null mutant  
321 alleles of *hml* - the relatively weak nature of the HCTR activity encoded by *Hm1<sup>A</sup>*. This



322 partial enzymatic activity of  $Hm1^A$  mirrored exactly the phenotypic strength of resistance  
323 conferred by this APR allele, which is recessive to that of WT *Hm1* but dominant to that  
324 of null *hm1*. Given that the APR allele at the *hm2* locus also confers partial resistance to  
325 CCR1 (Chintamanani et al., 2008), we pondered if this could be a requirement for a  
326 resistance gene to have an APR phenotype.

327 If this hypothesis that a *Hm1* APR allele owes its phenotype to being a weak or  
328 partial loss-of-function allele is correct, we should be able to confirm it by generating  
329 new APR alleles from the WT *Hm1* allele by mutagenesis. To address this possibility, we  
330 first tried a random mutagenesis screen to generate new alleles of *Hm1*, in large part  
331 because of the lethal nature of CCR1 infection on field-grown plants lacking functional  
332 *Hm1*. About 1,000  $M_2$  families of B73 were generated by treating pollen with the  
333 mutagen ethyl methanesulfonate (EMS). Twenty-four plants per  $M_2$  family were planted  
334 in a field and inoculated with CCR1 at the seedling stage. One  $M_2$  family was identified  
335 in which CCR1-susceptible plants segregated in a recessive fashion. These plants  
336 remained susceptible throughout their growth, suggesting they were the result of a null  
337 mutation. Sequence analysis of the *hm1* allele from this mutant (named *hm1-2*) confirmed  
338 its null status and revealed a single G to A transition at the junction of exon3/intron3 as  
339 the cause of mutation (Fig. S3). Since this change is expected to abolish the splicing of  
340 intron 3, it would result in a truncated protein lacking all the amino acids encoded by  
341 exons 4 and 5 (Fig. S3). It is unlikely that such a grossly truncated protein would have  
342 any HCTR activity, and as shown in Fig. 6, *hm1-2* exhibited very little enzymatic  
343 activity.

344 We next conducted a targeted mutagenesis screen to generate a series of mutant  
345 alleles of *Hm1*. To accomplish this, EMS-mutagenized *Hm1*<sup>B73</sup> pollen was applied to ears  
346 of completely susceptible Pr plants in a greenhouse (Fig. 4). Approximately 4,500  $M_1$   
347 seeds obtained from this cross were planted in the field and inoculated with CCR1 at  
348 week-2. Seven plants were identified as CCR1 susceptible at this seedling stage. When  
349 inoculated again at week-5, five of them were still fully susceptible, suggesting they were  
350 null mutants. The other two plants however exhibited APR as they developed different  
351 levels of resistance (Fig. S4). Sequencing the *Hm1* gene (Fig. S5) from all seven mutants  
352 revealed that they all carried GC to AT transitions in the coding region of *Hm1*. The two



353 APR-exhibiting alleles (designated *Hm1-3* and *Hm1-4*) had missense mutations resulting  
354 in single amino acid substitutions, T90M in *Hm1-3* and V210M in *Hm1-4*, in the HM1  
355 peptide (Table 1). Of the five null mutants, three (named *hm1-6* to *hm1-8*) had nonsense  
356 mutations, one a C82Y substitution (*hm1-5*), and one a splice-site mutation (*hm1-9*) at the  
357 junction of intron 4/exon 5 that also produced a pre-mature stop codon (Table 1). The  
358 new APR alleles were introgressed back into B73 for seven generations using CAPs  
359 markers. Comparison of the resistance phenotype of the two new APR alleles with *Hm1<sup>A</sup>*  
360 revealed that all three APR alleles differ markedly from each other in this trait. *Hm1-3*  
361 confers the highest level of resistance at all stages of development, followed by *Hm1<sup>A</sup>*  
362 and *Hm1-4* (Fig. 5). This screen thus provided us with a series of APR alleles at the *hm1*  
363 locus.

#### 364 **Like *Hm1<sup>A</sup>*, the new APR alleles encode HCTRs with intermediate activity**

365 To evaluate if the HCTR activity encoded by *Hm1-3* and *Hm1-4* was also partially  
366 compromised like that of *Hm1<sup>A</sup>*, we used the aforementioned LC-MS/MS based activity  
367 assay on samples derived from these two mutants as well as their positive and negative  
368 controls. During weeks-3 and 7 (when APR plants are susceptible and resistant,  
369 respectively), crude protein was extracted from the leaf tissue following inoculation with  
370 CCR1. The HCTR activity of extracts from APR plants was found to be significantly  
371 reduced when compared with B73 at both week-3 and week-7, indicating that HM1-3 and  
372 HM1-4 proteins display partially compromised HCTR activity during both susceptible  
373 and resistant plant ages like HM1<sup>A</sup> (Fig. 6). Furthermore, and consistent with HM1<sup>A</sup> (Fig.  
374 3C), the levels of their HCTR did not change significantly with age (Fig. 6),  
375 demonstrating that the APR encoded by these new alleles was also expressed without a  
376 concomitant increase in HCTR levels in mature plants.

377 Differences in the disease/resistance ratings of the new APR alleles predicted  
378 corresponding differences in their HCTR activities. This indeed was found to be true. The  
379 disease severity of APR plants at 3 weeks of age was found to be linearly correlated with  
380 HCTR activity (Fig. 5 and 6). The APR allele with the highest degree of HCTR activity  
381 was HM1-3, followed by HM1<sup>A</sup>, and HM1-4 being the weakest (Fig. 6). This variation  
382 in enzymatic activity is consistent with the gradient of CCR1 resistance displayed by  
383 *Hm1-3*, *Hm1<sup>A</sup>*, and *Hm1-4* plants from strongest to weakest (Fig. 5). At maturity,

384 however, plants carrying any of these weak alleles of *Hm1* were all indistinguishable  
385 from WT B73. This was not the case with plants carrying only the null allele; they  
386 remained uniformly susceptible to CCR1 infection even at maturity.

387 **Modulation of photosynthesis output alters susceptibility to CCR1 in *Hm1<sup>A</sup>***  
388 **seedlings**

389 If the HCTR levels of the APR alleles remain largely uniform throughout plant  
390 development, why then are weak alleles unable to confer protection at the seedling stage?  
391 Some anecdotal observations that we have made about plants with APR alleles suggested  
392 that the availability of fixed carbon for energy production played a role in determining  
393 the ability of these weak alleles to suppress disease. The APR mutants always exhibited  
394 greater disease susceptibility and prolonged sensitivity in winter greenhouses as  
395 compared to the field. In the winter greenhouse, those plants closest to supplemental  
396 lights were more resistant than plants growing distant from light fixtures. Third, the  
397 resistance phenotype of APR alleles was compromised in the dominant *oil-yellow1-*  
398 *NI989* allele that has a chlorophyll deficiency (Sawers et al., 2006).

399 We grew the *Hm1<sup>A</sup>* plants at extended and reduced photoperiods to test the  
400 hypothesis that energy availability from fixed carbon could determine disease  
401 susceptibility in APR mutants. We grew *Hm1<sup>A</sup>* B73 NIL homozygotes in a growth  
402 chamber with a light regimen of 12h light (L) and 12h dark (D) for 2 weeks. Following  
403 inoculation with CCR1 and overnight incubation, half of the seedlings were shifted to a  
404 growth chamber adjusted at 18h L and 6h D. *Hm1<sup>A</sup>* seedlings grown in 12:12 L:D  
405 photoperiod were susceptible to CCR1 when examined at 72 hours post-inoculation (hpi)  
406 (Fig. 7A) and showed no ability to suppress expanding lesions at 96 hpi (Fig. 7B).  
407 However, the *Hm1<sup>A</sup>* plants that were shifted to 18:6 L:D developed a resistant reaction  
408 instead (Fig. 7C and D). Thus, the seedling susceptibility of *Hm1<sup>A</sup>* conferred by low  
409 HCTR activity could be overcome by providing a longer period of photosynthetically  
410 active radiation.

411 We reasoned that if greater photosynthate availability provides enhanced  
412 resistance sufficient to permit the weak *Hm1* alleles to confer seedling resistance,  
413 disruption of energy balance should negate their ability to confer any resistance. To test  
414 this, we treated *Hm1<sup>A</sup>* and *Hm1-3* homozygotes with extended darkness or with the

415 herbicide (3-(3,4-dichlorophenyl)-1,1-dimethylurea) (DCMU), which disrupts electron  
416 transfer during the light reactions of photosynthesis. We inoculated two-week-old plants  
417 with CCR1 and grew them in 14:10 L:D or 4:20 L:D. Extending the dark period of the  
418 diurnal cycle resulted in an increase in disease severity after 7 days of growth for *Hm1-3*  
419 plants (Figure 8A). If extended darkness renders plants susceptible to CCR1 due to a lack  
420 of photosynthesis, then disruption of photosynthesis by herbicide treatment should effect  
421 the same result. To test this, plants grown at 14:10 L:D were inoculated with CCR1 and  
422 grown for 24 h. At 24 hpi, plants were divided into two groups with one receiving a  
423 solution of DCMU applied to the leaf whorl and then grown for 6 days under the 14:10  
424 L:D cycles. Observation of plants 7 dpi and 6 days after the DCMU treatment  
425 demonstrated that a single DCMU application rendered both *Hm1<sup>A</sup>* and *Hm1-3*  
426 homozygotes completely susceptible to CCR1 (Figure 8b).

427 Together, these two experiments demonstrate that light, and perhaps the energy  
428 status of the plant, were key determinants of resistance to CCR1, and provide a direct link  
429 between plant primary metabolism and physiology and disease resistance.

## 430 **DISCUSSION**

431 This study reveals one fundamental aspect of adult plant resistance (APR) in maize to  
432 CCR1. APR alleles at the *hm1* locus are weak determinants of resistance that fail to  
433 protect plants at the seedling stage but are sufficient to confer complete protection to  
434 CCR1 at maturity. This conclusion is supported by multiple lines of evidence derived  
435 from a combination of genetic, molecular, and biochemical experimentation. Genetic  
436 analysis demonstrated that all APR alleles of *hm1* confer partial resistance that exhibits  
437 haploinsufficiency (gene-dosage sensitivity) during most stages of plant development.  
438 This contrasts with resistance conferred by the wild type (WT) alleles of *hm1* that are  
439 completely dominant and protect every part of the plant regardless of age or maturity.  
440 Plants with null alleles of *hm1*, on the other hand, are susceptible to CCR1 at all stages of  
441 development. CCR1 infection typically results in plant lethality for these alleles, and the  
442 ubiquitous nature of this pathogen makes them difficult to propagate in the field. The  
443 APR alleles of *hm1* are recessive to the WT alleles (e.g., *Hm1<sup>B73</sup>*) but dominant to null  
444 alleles of *hm1* (e.g., *hm1<sup>Pr</sup>*).

445 Consistent with the idea that APR is a symptom of weak or partial loss-of-  
446 function alleles, we were able to generate two new APR alleles from the WT *Hm1*<sup>B73</sup>  
447 allele by mutagenesis with EMS. Five completely susceptible mutants were also  
448 recovered in this mutant screen, which presumably encoded null mutations. In keeping  
449 with these predictions, molecular analysis of these null alleles showed that four of the  
450 five null mutants were the result of nonsense mutations that truncated their predicted  
451 peptides by introducing premature stop codons. The fifth null mutant, which was caused  
452 by a missense mutation, changed a highly conserved cysteine residue (C82Y) that is  
453 perhaps critical for protein function. In sharp contrast, both novel APR alleles underwent  
454 relatively conservative mutational changes: T90M in *Hm1-3* and V210M in *Hm1-4*. Even  
455 *Hm1*<sup>A</sup>, which differs from the WT *Hm1*<sup>B73</sup> allele by five amino acids, seems to owe its  
456 APR phenotype to a single L116H change. HCTR activity was encoded by all of the APR  
457 alleles, indicating that none of these mutations completely eliminates the function of the  
458 enzyme. Their HCTR activities were compromised, however, being intermediate to that  
459 of the fully functional WT allele (which confers completely dominant protection) and the  
460 recessive null *hm1* alleles, which impart no resistance to CCR1. These results indicate  
461 that at some level HCTR activity is unable to deter the pathogen from colonizing maize  
462 plants at the seedling stage but that level of activity is sufficient to prevent CCR1 from  
463 colonizing at maturity.

464 A cause-and-effect relationship between APR and partial-loss-of-function alleles  
465 of *hm1* is further substantiated by the correlation between the strength of the resistance  
466 reaction conferred by an APR allele and its HCTR activity. The level of HCTR activity  
467 matched perfectly with the strength of CCR1 resistance conditioned by the three APR  
468 alleles. These results demonstrate that alleles of *hm1* with partial loss-of-function  
469 mutations encode HCTR with a compromised activity and that the weaker activity results  
470 in later onset of disease resistance. The resistance of seedlings encoding WT *Hm1*  
471 demonstrates that efficient toxin deactivation is sufficient for maize seedlings to resist  
472 CCR1 infection and, therefore, they express all of the required machinery for defense.  
473 Likewise, mature plants lacking *hm1* function are completely susceptible, demonstrating  
474 that HCTR is absolutely required for CCR1 infection, and mature maize plants are not  
475 protected from toxin-mediated disease spread. These interpretations depend on the *in*

476 *in vitro* assay correctly reflecting *in vivo* activity. Our *in vitro* HCTR activity assay did not  
477 detect the *in vivo* activity of the enzyme but instead the level of the functional protein  
478 present at a given time point. It is possible that *in vivo* activity did not correspond to the  
479 *in vitro* activity identified by this method.

480 A seemingly mechanistic relationship between partial resistance and APR is also  
481 evident in many other pathosystems where such genes have been cloned and studied in  
482 detail. One example is that of *Cf-9B*, which mediates incomplete resistance to *C. fulvum*  
483 in a developmentally specified fashion (Panter et al., 2002). Its paralog *Cf9*, which  
484 encodes a receptor like protein, confers complete protection in all plant tissues at every  
485 stage of development (Parniske et al., 1997). Another example is that of *Xa21*, a receptor-  
486 like kinase that confers weak resistance to *Xanthomonas* leaf blight in rice (Song et al.,  
487 1995; Century et al., 1999). The maize *Hm2* APR allele provides another example. The  
488 weak CCR1 resistance provided by this allele is conferred by a truncated HCTR  
489 (Chintamanani et al., 2008).

490 In wheat, APR genes are rather common and have been used widely to protect  
491 this crop from all forms of the disease caused by three different species of rust pathogens  
492 (reviewed in Ellis et al., 2014). Even though APR genes confer little or no protection in  
493 wheat seedlings, the broad-spectrum and durable nature of resistance provided by such  
494 genes in adult plants have many breeders proclaim that breeding for rust resistance  
495 should deploy only APR genes (Ellis et al., 2014). Three of these wheat APR genes have  
496 been cloned recently and, interestingly, they all appear to confer resistance by different  
497 mechanisms. One of them, *Yr36*, a mediator of resistance to yellow rust, encodes a kinase  
498 with an unusual domain (Fu et al., 2009), while *Lr34* and *Lr67*, both of which mediate  
499 APR to both rust and powdery mildew pathogens, encode an ABC transporter and a  
500 hexose transporter, respectively (Krattinger et al., 2009; Moore et al., 2015). Exactly how  
501 these genes confer APR remains unresolved, but one thread that unifies them is their  
502 ability to confer only weak or partial resistance (Ellis et al., 2014). Overexpression of  
503 *Lr34*, one of the best studied APR genes, however, did enable it to confer seedling  
504 resistance in durum wheat (Risk et al., 2012). Furthermore, the efficacy of this transgene  
505 in conferring seedling resistance improved even further under extended daylight  
506 conditions (Rinaldo et al., 2017). These results echo what we have discovered with the

507 APR alleles in maize and suggest that the connection between weak resistance and APR  
508 is not unique to the maize-CCR1 pathosystem but perhaps is a general feature of most  
509 disease resistance genes that are weak and provide only partial protection.

510 A second major finding is that APR is not the result of the enhanced activity of  
511 proteins encoded by APR alleles at the mature-plant stage. Rather, it must be the result of  
512 a change in seedlings vs mature plants that affects differential resistance. It was  
513 previously shown in a number of cases that the differential transcriptional activity of an  
514 APR gene did not account for its APR phenotype (Century et al., 1999; Panter et al.,  
515 2002; McDowell et al., 2005; Chintamanani et al., 2008; Krattinger et al., 2009). Here we  
516 extend this to the HCTR activity of the accumulated HM1 proteins, which remained  
517 stable across development. At the onset of APR, resistance manifests uniformly in all  
518 parts of the plant, including the youngest leaves that are still unfurled, indicating that the  
519 APR-inducing factor is not accumulated over a long period of time in aging tissues, but  
520 rather is available in every part of the plant regardless of the age of the organ and  
521 determined solely by the plant maturity.

522 Considering that the HCTR activity is present at equivalent levels in APR mutant  
523 extracts regardless of plant stage, why then are seedlings susceptible? Though the studies  
524 presented here do not resolve this question, the biochemical mechanism by which *hml*  
525 confers resistance to CCR1 suggests a plausible scenario. Although this resistance is  
526 conferred by *hml*-encoded HCTR, the HC-toxin (HCT) inactivation reaction requires the  
527 reducing power of NADPH as a co-substrate. The direct involvement of NADPH in HC-  
528 toxin reduction suggests this molecule could be very critical in regulating resistance in  
529 the maize-CCR1 pathosystem. Supporting this hypothesis are our results showing that  
530 light and photosynthetic activity have a great impact on resistance mediated by APR  
531 alleles, either boosting them to confer seedling resistance or limiting them to prevent  
532 APR.

533 Based on these results, it could well be the availability of NADPH that determines  
534 the difference in resistance between seedling and mature stages in the *hml* APR mutants.  
535 NADPH is produced during the light reactions of photosynthesis, the C4 malate shuttle,  
536 and sugar oxidation, along with other energy carriers such as ATP. Maize seedlings not  
537 only have a limited photosynthetic capacity to assimilate carbon (C), but also strong sinks



538 to consume these assimilates (Kalt-Torres et al., 1987). As a result, seedling leaves  
539 become C-deficient at night and that may negatively impact the availability of NADPH  
540 and ATP. Since NADPH is required for HCTR activity, its depletion at night may  
541 negatively impact the activity of hypomorphic mutants of HCTR, thereby leaving HCT  
542 active to induce susceptibility to CCR1. Bolstering this hypothesis is the observation that  
543 the *Hm1-3* and *Hm1-4* mutations occur at residues predicted to be critical for the binding  
544 of NADPH to HCTR (Dehury et al., 2014). The WT HCTR has likely evolved to require  
545 lower NADPH levels for optimal activity, buffering any impact from the likely diurnal  
546 dip in its cofactor at night and thereby allowing sufficient HCT inactivation. This  
547 scenario also explains why plants with the APR genes become more resistant as they  
548 mature; the increased output of photosynthates may outstrip the sink requirements,  
549 allowing excess photosynthates to be stored as starch during the day and then used at  
550 night to fuel NADPH production.

551 Although several other aspects of plant bioenergetics are expected to support the  
552 resistance phenotype of the APR genes in most pathosystems, NADPH appears to be the  
553 most critical in energizing APR in the maize-CCR1 pathosystem. This, of course, is due  
554 to the direct involvement of this molecule in the resistance mechanism mediated by  
555 HCTR, and is supported by the fact that maize plants carrying the WT *Hm1* gene are  
556 completely resistant to CCR1 at all stages of development, including as seedlings. This  
557 study thus provides direct evidence linking, for the first time, primary host metabolism to  
558 the realm of disease resistance in plants.

559 An intriguing implication of this study concerns the metabolic cost of resistance  
560 in plants. This topic is not only of fundamental interest to plant pathologists and  
561 entomologists but also has huge agricultural relevance (Huot et al., 2014; Karasov et al.,  
562 2017; Guo et al., 2018). Our study demonstrates that, compared to strong resistance, the  
563 weak form of resistance has a much higher metabolic cost for the host. As shown in the  
564 case of APR, this cost can be so high that the seedlings are not robust enough  
565 metabolically to express such resistance effectively. This argument also extends to the  
566 quantitative form of resistance that is often relatively weak and easily affected by the  
567 environment (Poland et al., 2009; French et al., 2016). An additional complication is that  
568 the vulnerability of seedlings to diseases increases even further by conditions that



569 compromise photosynthesis. This phenomenon is analogous to what has been well  
570 established in the animal world that malnutrition compromises the immunity of infants  
571 much more than that of adults (Katona and Katona-Apte, 2008; Walson and Berkley,  
572 2018).

## 573 **METHODS**

### 574 **Plant materials**

575 The inbred P8 and landraces Pira and Enano were obtained from Germplasm Resources  
576 Information Network (GRIN) of the U.S. National Plant Germplasm System. The CCR1-  
577 susceptible maize inbred Pr, and the CCR1-resistant inbreds B73, Va35, W22, and Pr1 (a  
578 near-isogenic line of Pr) were previously available in our research program. To determine  
579 whether *HmI<sup>A</sup>* is an allele of *HmI*, P8 was crossed with Pr and the F<sub>1</sub> hybrid was  
580 backcrossed to Pr to generate a BC<sub>1</sub>F<sub>1</sub> population. Additionally, P8 was crossed with Pr1  
581 and the resulting F<sub>1</sub> hybrid was testcrossed to the *hmI* null stock Pr. Near-isogenic lines  
582 of B73 displaying APR to CCR1 infection were generated by backcrossing *hmI* APR  
583 alleles with the B73 inbred, to determine the behavior of the APR alleles in a uniform  
584 genetic background.

### 585 **Pathogen growth and inoculation**

586 The protocol for culturing CCR1 pathogen on carrot juice agar medium was the same as  
587 previously described (Johal and Briggs, 1992). One-hundred µl of 10<sup>5</sup> spores/ml of CCR1  
588 conidial suspension was used for leaf whorl inoculations. To study the phenotypic  
589 manifestation of APR by the *HmI<sup>A</sup>* allele, both homozygous (*HmI<sup>A</sup>HmI<sup>A</sup>* introgressed  
590 into B73) and heterozygous (*HmI<sup>A</sup>hmI<sup>Pr</sup>* also in B73) plants were planted in isolation at  
591 the Purdue ACRE farm and inoculated with 100 µl of 10<sup>5</sup> spores/mL of CCR1 spore  
592 suspension. Wild type B73 encoding *HmI<sup>B73</sup>* and the susceptible *hmI<sup>Pr</sup>* B73 NIL plants  
593 were used as resistant and susceptible controls, respectively. A fresh set of five rows of  
594 ~40 plants per row was inoculated every week, and disease severity rating was  
595 determined 5 days post-inoculation (dpi) as described previously (Chintamanani et al.,  
596 2008). To determine if *HmI<sup>A</sup>* is an allele of *HmI*, genetic crosses were made at the ACRE  
597 farm and the resulting segregating progeny was evaluated under field conditions again at  
598 the ACRE farm.

### 599 **Amplification of *Hm1<sup>A</sup>* genomic DNA**

600 Four primer pairs were designed to amplify *Hm1<sup>A</sup>* based on its sequence homology with  
601 *Hm1<sup>B73</sup>*. The promoter region was amplified using a primer pair based on the promoter of  
602 *hml* from Pr. Touchdown PCR (Don et al., 1991) was carried out with 10 consecutive  
603 cycles of denaturation at 94°C for 30 sec, annealing at 63°C for 30 sec with a decrease in  
604 0.5°C per cycle to a “touchdown” of 58°C, and extension at 72°C for 30 sec; followed by  
605 35 cycles of 94°C for 30 sec, 58°C for 30 sec, and 72°C for 45 sec. Three separate PCR  
606 reactions were carried out for every primer so that any errors initiated by either the  
607 GoTaq DNA Polymerase (Promega, Madison, WI, USA) or by sequencing could be ruled  
608 out. The PCR products were cleaned by running them through an agarose column,  
609 BigDye sequencing reactions were conducted, and the products precipitated with sodium  
610 acetate and ethanol before final resuspension in 20 µl of double-distilled water (ddH<sub>2</sub>O).  
611 These samples were submitted to the Purdue Genomics Facility for low throughput  
612 sequencing. Forward and reverse complementary sequences for each primer were  
613 compared using the ClustalW2 multiple alignment program. In order to assemble the  
614 *Hm1<sup>A</sup>* sequence without sequencing errors, only sequences with at least three perfect  
615 reads for each primer sequence were considered.

### 616 **Cloning of *Hm1<sup>A</sup>* cDNA**

617 P8 (*Hm1<sup>A</sup>Hm1<sup>A</sup>*) seeds were planted in 500M MetroMix and grown in Conviron growth  
618 chambers for two weeks. One-hundred µl of 10<sup>5</sup> spores/mL CCR1 spore suspension was  
619 used for whorl inoculation, and plants were covered with a hood overnight to maintain  
620 humidity required for spore germination and penetration into the leaf tissue. At 24 h post-  
621 inoculation (hpi), affected leaf tissue was collected from the plants and snap-frozen in  
622 liquid nitrogen. RNA was extracted with a Qiagen RNeasy extraction kit (Qiagen,  
623 Germantown, MD), and cDNA was synthesized by RT-PCR using random hexamer mix  
624 (New England BioLabs, Ipswich, MA).

### 625 **Generating near-isogenic lines of B73 manifesting APR and susceptibility to CCR1**

626 The P8 maize inbred line was crossed with the maize reference B73 inbred, and the  
627 resulting F<sub>1</sub> hybrid was backcrossed to B73. To introgress *Hm1<sup>A</sup>* into the B73 inbred, the  
628 resulting BC<sub>1</sub>F<sub>1</sub> progeny was backcrossed to B73 for six generations. Since the promoter  
629 region of *Hm1<sup>B73</sup>* differed from that of *Hm1<sup>A</sup>*, PCR-based markers designed from the

630 promotor region were used for introgressing *Hm1<sup>A</sup>* into B73 (primer sequences are  
631 available in Table. S1). After the BC<sub>7</sub> generation, *Hm1<sup>A</sup>* containing plants (*Hm1Hm1<sup>A</sup>*)  
632 were self-pollinated to generate homozygous *Hm1<sup>A</sup>* B73 NIL plants. Homozygous *Hm1<sup>A</sup>*  
633 B73 NIL plants were identified with PCR-based markers and were self-pollinated to  
634 generate seed. Similar to *Hm1<sup>A</sup>*, the two novel APR alleles *Hm1-3* and *-4* generated  
635 through EMS mutagenesis were introgressed into the B73 inbred for seven generations  
636 using a Cleaved Amplified Polymorphic sequences (CAPs) assay (primer sequences in  
637 Table. S1). The restriction enzyme *NlaIII* (New England BioLabs, Ipswich, MA) was  
638 used to differentiate the *Hm1<sup>B73</sup>* allele from the two novel APR alleles. Similar to the  
639 novel APR alleles, the novel null allele *hm1-2* identified in the EMS-mutagenized B73  
640 M<sub>2</sub> family screen was backcrossed for five generations into B73 using PCR-based  
641 markers and self-pollinated to obtain a homozygous *hm1-2* NIL in B73. Marker-assisted  
642 backcrossing using PCR-based genotyping was conducted on plants grown at the Purdue  
643 Agronomy Center for Research and Education (ACRE) farm during the summer and in  
644 the Purdue University Botany and Plant Pathology greenhouses during the winter season.

#### 645 **Transcriptional activity of *Hm1<sup>A</sup>***

646 *Hm1<sup>A</sup>* plants were inoculated with CCR1 spore suspension as described above at weekly  
647 intervals from the seedling stage to maturity (week-1 through week-8). Total RNA was  
648 isolated from CCR1-infected leaf tissue as described by Eggermont et al. (1996) and  
649 treated with RNase-free DNase I to eliminate genomic DNA using the TURBO DNA-  
650 free Kit (Ambion, Austin, TX). One µg of treated RNA was reverse-transcribed to cDNA  
651 in a total volume of 25 µl using the iScript<sup>TM</sup> cDNA Synthesis kit from Bio-Rad  
652 (Hercules, CA). RT-PCR was conducted using gene specific primers with the maize actin  
653 transcript as a control (see Table S1 for primer information). RT-PCR was conducted  
654 under the following conditions: denaturation at 94°C for 1 min, annealing at 60°C for 1  
655 min, extension at 72°C for 1 min, and a terminal extension steps for 10 min. 30 and 28  
656 cycles of PCR were conducted to amplify *Hm1<sup>A</sup>* and the control actin gene, respectively.  
657 Amplified PCR products were separated on a 0.8% agarose gel to visualize the  
658 expression of the *Hm1<sup>A</sup>* transcript. Three replicates for each time point were used for this  
659 experiment.

660 Additionally, qRT-PCR was conducted on cDNA from *Hm1<sup>A</sup>* plants inoculated  
661 with CCR1 at week-1, -3, -5, and -7 using gene specific primers. For relative  
662 quantification, Molybdenum co-factor biosynthesis protein (MOL, GRMZM2G067176)  
663 was used as a reference gene (Hartwig et al., 2011). All primer combinations had an  
664 efficiency of 90-100%. Individual qRT-PCR reactions contained 5  $\mu$ l of SYBR® Select  
665 Master Mix (Applied Biosystems, Foster City, CA), 2  $\mu$ l of cDNA template (20x  
666 dilution), and the appropriate amount of forward and reverse primers plus water. A three-  
667 step qRT-PCR amplification (40 cycles of 95°C for 5 s followed by 61°C for 20 s and  
668 72°C for 30 s) was performed using the Mx3000P qPCR system (Stratagene–Agilent  
669 Technologies, Santa Clara, CA). Semi-quantitative RT-PCR was conducted using gene-  
670 specific primers for *Hm1<sup>A</sup>* and the reference gene *Actin* (primer sequence in Table S5).  
671 Three replicates for each time point were used for this experiment.

#### 672 **Generating novel APR manifesting alleles of *Hm1* by EMS mutagenesis**

673 The B73 (*Hm1Hm1hm2hm2*) maize inbred, which exhibits complete resistance to CCR1  
674 at all stages of plant development (Johal and Briggs, 1992), was the pollen parent for the  
675 targeted EMS mutagenesis screen. The CCR1-susceptible maize inbred Pr  
676 (*hm1hm1hm2hm2*) (Nelson and Ullstrup, 1964; Multani et al., 1998), which exhibited  
677 complete susceptibility to CCR1 at all stages of plant development, was used as the  
678 female parent. This experiment was conducted in a greenhouse facility, as the Pr plants  
679 do not survive in the field due to high levels of disease pressure.

680 To conduct pollen EMS mutagenesis, EMS stock solution was prepared by adding  
681 1 ml of EMS (Sigma-Aldrich, St. Louis, MO) to 99 ml of paraffin oil (Sigma-Aldrich, St.  
682 Louis, MO). Tassels of the Pr plants were removed before starting the experiment. On the  
683 day of conducting pollen mutagenesis, EMS working solution was prepared by mixing 1  
684 ml of EMS stock solution with 14 ml of paraffin oil. This working solution of EMS was  
685 mixed gently for one hour to uniformly disperse the EMS in paraffin oil. B73 pollen was  
686 collected in tassel bags, measured and transferred to a 50-ml Nalgene bottle. For every 1  
687 ml of pollen collected, 10 ml of EMS working solution was added. The EMS-treated  
688 pollen was placed on ice and mixed gently every 5 min for 45 min. About two to three  
689 drops of EMS-treated B73 pollen was then applied to the silks of Pr ears. Ears from these  
690 Pr plants were harvested 45 days after pollination. The M<sub>1</sub> seeds (~4500) obtained from

691 this genetic cross were planted at the Purdue ACRE farm. At both week-2 and week-5,  
692 plants were whorl-inoculated with 100  $\mu$ l of  $10^5$  spores/mL of CCR1 conidial suspension  
693 and screened for their disease response one week post-inoculation.

#### 694 **Amplification of *HmI*<sup>B73</sup> allele from heterozygous CCR1-susceptible mutants**

695 Based on sequence polymorphisms between the wild type *HmI* from B73, *HmI*<sup>B73</sup> and  
696 the null *hmI* allele from Pr, *hmI*<sup>Pr</sup>, four primer pairs amplifying -560-bp of the promoter  
697 region from the translation start site and the entire coding region of *HmI* were designed  
698 to preferentially amplify the WT *HmI*<sup>B73</sup> from heterozygous M<sub>1</sub> plants (Fig. S5), which  
699 were obtained by crossing Pr plants with EMS-treated B73 pollen. Four overlapping  
700 primer combinations (primer sequences in Table S1) were used to preferentially amplify  
701 *HmI*<sup>B73</sup> over the *hmI*<sup>Pr</sup> allele. Amplified PCR fragments were processed as described  
702 above for *HmI*<sup>A</sup> amplification and submitted to the Purdue Genomics Facility for low-  
703 throughput sequencing.

#### 704 **HCTR activity in plant protein extracts**

705 *HmI*<sup>B73</sup>, *hmI*<sup>Pr</sup>, and *HmI*<sup>A</sup> plants grown in the field were inoculated with 200  $\mu$ l of  $10^5$   
706 spores/mL CCR1 spore suspension into the leaf whorl at weeks-3 and -7. Four biological  
707 replicates of three inoculated plants were sampled 24 hpi and stored at -80°C until used.  
708 Total plant protein was extracted using a protocol adapted from Hayashi et al. (2005) and  
709 desalted using a Sephadex G-50 Fine column (GE Healthcare, Chicago, IL). After  
710 determining protein concentration with a Bradford assay, 13.55  $\mu$ g of protein was used to  
711 start reactions containing 25 mM Tris-HCl (pH 7.0), 160 mM NADPH, and 55  $\mu$ M HC-  
712 toxin. The assays were run at 30°C in the dark for 45 min and then stopped by the  
713 addition of 1.25 ml cold acetone. After centrifugation at 15,000 x g for 15 min at 4°C, 10  
714  $\mu$ L of the supernatant was injected onto an Atlantis T3 column (2.1 x 150 mm, 3  $\mu$ m, 100  
715 Å, Waters) maintained at room temperature and analyzed using an Agilent 1200 series  
716 LC instrument coupled to an Agilent 6460 triple quadrupole mass spectrometer (Agilent  
717 Technologies, Santa Clara, CA) at the Bindley Bioscience Center in Purdue Discovery  
718 Park.

719 The solvent system contained solvents A (0.1% formic acid in ddH<sub>2</sub>O) and B  
720 (0.1% acetonitrile). The column was eluted with 85% A and 15% B (0 to 1 min),  
721 followed by a linear gradient from 1 to 16 min to 40% A and 60% B, and a hold from 16

722 to 16.5 min at 40% A and 60% B. The column solvent was then reduced from 60% B to  
723 15% B (16.5 to 17 min) and kept isocratic at 15% B from 17 to 22 min with a flow rate of  
724 0.3 ml/min. HC-toxin (Sigma-Aldrich, St. Louis, MO) and its reduced form eluted from  
725 the column at 8.5–11.5 min under these conditions. During the analysis, the column  
726 effluent was directed to the MS/MS, with the Jetstream ESI set to positive mode with  
727 nozzle and capillary voltages at 1000 – 4000 V. The nebulizer pressure was set at 35 psi,  
728 the nitrogen drying gas was set at 325°C with a flow rate of 8 L/min, and the sheath gas  
729 was held at 250°C at a flow rate of 7 L/min. Fragmentation was achieved with 70 V for  
730 both analytes. Multiple reaction monitoring (MRM) was used to selectively detect HC-  
731 toxin and its reduced form. The first quadrupole was set to transition between the  $[M-H]^+$   
732 of the analytes, whereas the last quadrupole monitored  $m/z$  411 and 409 for reduced and  
733 normal HC-toxin respectively. Each transition was monitored with a dwell time of 150  
734 ms and collision energy of 15 V, with ultrapure nitrogen used as the collision gas. Mass  
735 selection was achieved using the following ions: 439.3 for reduced HC-toxin and 437.3  
736 for HC-toxin. Data were collected and analyzed via the MassHunter Workstation (version  
737 B.06.00, Agilent Technologies, Santa Clara, CA), and peak areas were determined by  
738 integration. Similar to *Hml<sup>A</sup>*, the HCTR activity of the new APR alleles generated by  
739 targeted EMS mutagenesis (*Hml-3* and *Hml-4*) along with resistant (*Hml*) and  
740 susceptible (*hml-2*) controls were also evaluated by LC-MS/MS.

#### 741 **Differential photoperiod treatments of *Hml<sup>A</sup>* plants**

742 *Hml<sup>A</sup>* B73 NIL plants were grown in Conviron growth chambers providing a 12:12 L:D  
743 photoperiod. Two-week-old *Hml<sup>A</sup>* plants were inoculated with 100  $\mu$ l of  $10^5$  spores/mL  
744 of CCR1 spore suspension into the leaf whorl. CCR1-inoculated plants were incubated  
745 overnight in a humidity chamber at 80% relative humidity. These plants were then  
746 subjected to 12:12 L:D or 18:6 L:D photoperiods. The response reaction to CCR1  
747 infection was evaluated every 24 h for a 96 h period. Digital photographs of lesion  
748 progression were taken using a Canon EOS Digital Rebel XSi camera.

749 Additional extended darkness and DCMU treatment experiments were performed  
750 in growth chambers on plants homozygous *Hml<sup>A</sup>* and *Hml-3* in the B73 genetic  
751 background. Plants were grown in a growth chamber under 14:10 L:D for two weeks. We  
752 inoculated these plants with CCR1 and subjected them to two different light regimes,



753 14:10 L:D or 4:20 L:D. On a subset of CCR1 inoculated plants transferred to 14:10 L:D,  
754 the herbicide (3-(3,4-dichlorophenyl)-1,1-dimethylurea) (DCMU) at a concentration of  
755 100  $\mu$ M was applied to the leaf whorl 24 hpi. Disease severity of these plants was  
756 determined at 7 dpi.

## 757 ACKNOWLEDGEMENTS

758 This work was partially supported by GSJ's Hatch project (IND011280), by the IOS-NSF  
759 grant 0547132 to G.S.J., and by the National Science Foundation Plant Genome Research  
760 Program grant 1444503 to B.P.D. and G.S.J.

## 761 AUTHOR CONTRIBUTIONS

762 DSM, SC, SM and GSJ designed and performed linkage analysis studies. DSM did the  
763 Southern blots and also constructed and screened the lambda library to clone *Hm1<sup>A</sup>*. SM  
764 conducted sequence alignment analysis with *Hm1* orthologs and different maize inbreds.  
765 SC performed *Hm1<sup>A</sup>* transcriptome analysis using semi-quantitative RT-PCR and AK  
766 conducted qRT-PCR. KC and AK designed and performed HCTR assays. SC, SM, and  
767 GJ designed and conducted EMS mutagenesis. SM, KC, and GJ screened EMS-generated  
768 M<sub>1</sub> plants for their disease response to CCR1. SM, AD, BK, BD and GJ designed and  
769 performed experiments to look at the effect of photosynthesis on APR. LD initially  
770 provided P8, the inbred possessing *Hm1A*, and worked with GJ to characterize its APR.  
771 SM, SC, KC, BD, and GJ wrote the paper. All authors reviewed the manuscript and LD  
772 provided the detailed editorial changes.

## 773 REFERENCES

- 774 **Abedon, B.G. and Tracy, W.F.** (1996). Corngrass 1 of maize (*Zea mays* L.) delays  
775 development of adult plant resistance to common rust (*Puccinia sorghi* Schw.)  
776 and European corn borer (*Ostrinia nubilalis* Hubner). *J. Hered.* **87**: 219–223.
- 777 **Century, K.S., Lagman, R.A., Adkisson, M., Morlan, J., Tobias, R., Schwartz, K.,**  
778 **Smith, A., Love, J., Ronald, P.C., and Whalen, M.C.** (1999). Developmental  
779 control of Xa21-mediated disease resistance in rice. *Plant J.* **20**: 231–236.
- 780 **Chintamanani, S., Multani, D.S., Ruess, H., and Johal, G.S.** (2008). Distinct  
781 mechanisms govern the dosage-dependent and developmentally regulated  
782 resistance conferred by the maize *Hm2* gene. *Mol. Plant. Microbe Interact.* **21**:  
783 79–86.



- 784 **Cook, D.E. et al.** (2012). Copy number variation of multiple genes at *Rhg1* mediates  
785 nematode resistance in soybean. *Science* **338**: 1206–1209.
- 786 **Dehury, B., Patra, M.C., Maharana, J., Sahu, J., Sen, P., Modi, M.K., Choudhury,**  
787 **M.D., and Barooah, M.** (2014). Structure-based computational study of two  
788 disease resistance gene homologues (*Hm1* and *Hm2*) in maize (*Zea mays* L.) with  
789 implications in plant-pathogen interactions. *PLOS ONE* **9**: e97852.
- 790 **Develey-Rivière, M.-P. and Galiana, E.** (2007). Resistance to pathogens and host  
791 developmental stage: a multifaceted relationship within the plant kingdom. *New*  
792 *Phytol.* **175**: 405–416.
- 793 **Don, R.H., Cox, P.T., Wainwright, B.J., Baker, K., and Mattick, J.S.** (1991).  
794 “Touchdown” PCR to circumvent spurious priming during gene amplification.  
795 *Nucleic Acids Res.* **19**: 4008.
- 796 **Dyck, P.L., Samborski, D. J., and Anderson, R. G.** (1966). Inheritance of adult-plant  
797 leaf rust resistance derived from the common wheat varieties Exchange and  
798 Frontana. *Can. J. Genet. Cytol.* **8**: 665–671.
- 799 **Eggermont, K., Goderis, I.J., and Broekaert, W.F.** (1996). High-throughput RNA  
800 extraction from plant samples based on homogenisation by reciprocal shaking in  
801 the presence of a mixture of sand and glass beads. *Plant Mol. Biol. Report.* **14**:  
802 273–279.
- 803 **Ellis, J.G., Lagudah, E.S., Spielmeier, W., and Dodds, P.N.** (2014). The past, present  
804 and future of breeding rust resistant wheat. *Front. Plant Sci.* **5**: 1–13.
- 805 **French, E., Kim, B.-S., and Iyer-Pascuzzi, A.S.** (2016). Mechanisms of quantitative  
806 disease resistance in plants. *Semin. Cell Dev. Biol.* **56**: 201–208.
- 807 **Fu, D., Uauy, C., Distelfeld, A., Blechl, A., Epstein, L., Chen, X., Sela, H., Fahima,**  
808 **T., and Dubcovsky, J.** (2009). A kinase-START gene confers temperature-  
809 dependent resistance to wheat stripe rust. *Science* **323**: 1357–1360.
- 810 **Guo, Q., Major, I.T., and Howe, G.A.** (2018). Resolution of growth–defense conflict:  
811 mechanistic insights from jasmonate signaling. *Curr. Opin. Plant Biol.* **44**: 72–81.
- 812 **Hartwig, T., Chuck, G.S., Fujioka, S., Klempien, A., Weizbauer, R., Potluri, D.P.V.,**  
813 **Choe, S., Johal, G.S., and Schulz, B.** (2011). Brassinosteroid control of sex  
814 determination in maize. *Proc. Natl. Acad. Sci.* **108**: 19814–19819.
- 815 **Hayashi, K., Yoshida, K., and Matsui, Y.** (2005). A histone H3 methyltransferase  
816 controls epigenetic events required for meiotic prophase. *Nature* **438**: 374–378.
- 817 **Huot, B., Yao, J., Montgomery, B.L., and He, S.Y.** (2014). Growth–defense tradeoffs  
818 in plants: A balancing act to optimize fitness. *Mol. Plant* **7**: 1267–1287.

- 819 **Johal, G.S. and Briggs, S.P.** (1992). Reductase activity encoded by the HM1 disease  
820 resistance gene in maize. *Science* **258**: 985–987.
- 821 **Johal, G.S., Gray, J., Gruis, D., and Briggs, S.P.** (1995). Convergent insights into  
822 mechanisms determining disease and resistance response in plant–fungal  
823 interactions. *Can. J. Bot.* **73**: 468–474.
- 824 **Jones, I.T. and Hayes, J.D.** (1971). The effect of sowing date on adult plant resistance to  
825 *Erysiphe graminis* f.sp. avenae in oats. *Ann. Appl. Biol.* **68**: 31–39.
- 826 **Jones, J.D.G. and Dangl, J.L.** (2006). The plant immune system. *Nature* **444**: 323–329.
- 827 **Jones, J.D.G., Vance, R.E., and Dangl, J.L.** (2016). Intracellular innate immune  
828 surveillance devices in plants and animals. *Science* **354**: aaf6395-1– 8.
- 829 **Kalt-Torres, W., Kerr, P.S., Usuda, H., and Huber, S.C.** (1987). Diurnal changes in  
830 maize leaf photosynthesis 1. *Plant Physiol.* **83**: 283–288.
- 831 **Karasov, T.L., Chae, E., Herman, J.J., and Bergelson, J.** (2017). Mechanisms to  
832 mitigate the trade-off between growth and defense. *Plant Cell* **29**: 666–680.
- 833 **Katona, P. and Katona-Apte, J.** (2008). The interaction between nutrition and infection.  
834 *Clin. Infect. Dis.* **46**: 1582–1588.
- 835 **Kim, S.-D., Knoche, H.W., and Dunkle, L.D.** (1987). Essentiality of the ketone  
836 function for toxicity of the host-selective toxin produced by *Helminthosporium*  
837 *carbonum*. *Physiol. Mol. Plant Pathol.* **30**: 433–440.
- 838 **Krattinger, S.G., Lagudah, E.S., Spielmeyer, W., Singh, R.P., Huerta-Espino, J.,**  
839 **McFadden, H., Bossolini, E., Selter, L.L., and Keller, B.** (2009). A putative  
840 ABC transporter confers durable resistance to multiple fungal pathogens in wheat.  
841 *Science* **323**: 1360–1363.
- 842 **Kus, J.V., Zaton, K., Sarkar, R., and Cameron, R.K.** (2002). Age-related resistance in  
843 *Arabidopsis* is a developmentally regulated defense response to *Pseudomonas*  
844 *syringae*. *Plant Cell* **14**: 479–490.
- 845 **McDowell, J.M., Williams, S.G., Funderburg, N.T., Eulgem, T., and Dangl, J.L.**  
846 (2005). Genetic analysis of developmentally regulated resistance to downy  
847 mildew (*Hyaloperonospora parasitica*) in *Arabidopsis thaliana*. *Mol. Plant.*  
848 *Microbe Interact.* **18**: 1226–1234.
- 849 **Meeley, R.B., Johal, G.S., Briggs, S.P., and Walton, J.D.** (1992). A biochemical  
850 phenotype for a disease resistance gene of maize. *Plant Cell* **4**: 71–77.
- 851 **Milligan, S.B., Bodeau, J., Yaghoobi, J., Kaloshian, I., Zabel, P., and Williamson,**  
852 **V.M.** (1998). The root knot nematode resistance gene *Mi* from tomato is a

- 853 member of the leucine zipper, nucleotide binding, leucine-rich repeat family of  
854 plant genes. *Plant Cell* **10**: 1307–1319.
- 855 **Moore, J.W. et al.** (2015). A recently evolved hexose transporter variant confers  
856 resistance to multiple pathogens in wheat. *Nat. Genet.* **47**: 1494–1498.
- 857 **Multani, D.S., Meeley, R.B., Paterson, A.H., Gray, J., Briggs, S.P., and Johal, G.S.**  
858 (1998). Plant–pathogen microevolution: Molecular basis for the origin of a fungal  
859 disease in maize. *Proc. Natl. Acad. Sci. U. S. A.* **95**: 1686–1691.
- 860 **Nelson, O.E. and Ullstrup, A.J.** (1964). Resistance to leaf spot in maize: genetic control  
861 of resistance to Race I of *Helminthosporium carbonum* Ull. *J. Hered.* **55**: 195–  
862 199.
- 863 **Panter, S.N., Hammond-Kosack, K.E., Harrison, K., Jones, J.D.G., and Jones, D.A.**  
864 (2002). Developmental control of promoter activity is not responsible for mature  
865 onset of *Cf-9B*-mediated resistance to leaf mold in tomato. *Mol. Plant. Microbe*  
866 *Interact.* **15**: 1099–1107.
- 867 **Panter, S.N. and Jones, D.A.** (2002). Age-related resistance to plant pathogens. In  
868 *Advances in Botanical Research* (Academic Press), pp. 251–280.
- 869 **Parniske, M., Hammond-Kosack, K.E., Golstein, C., Thomas, C.M., Jones, D.A.,**  
870 **Harrison, K., Wulff, B.B.H., and Jones, J.D.G.** (1997). Novel disease resistance  
871 specificities result from sequence exchange between tandemly repeated genes at  
872 the *Cf-4/9* locus of tomato. *Cell* **91**: 821–832.
- 873 **Piffanelli, P., Ramsay, L., Benabdelmouna, A., D’Hont, A., Jørgensen, J.H.,**  
874 **Hollricher, K., Schulze-Lefert, P., Panstruga, R., and Waugh, R.** (2004). A  
875 barley cultivation-associated polymorphism conveys resistance to powdery  
876 mildew. *Nature* **430**: 887.
- 877 **Poland, J.A., Balint-Kurti, P.J., Wissler, R.J., Pratt, R.C., and Nelson, R.J.** (2009).  
878 Shades of gray: the world of quantitative disease resistance. *Trends Plant Sci.* **14**:  
879 21–29.
- 880 **Rinaldo, A., Gilbert, B., Boni, R., Krattinger, S.G., Singh, D., Park, R.F., Lagudah,**  
881 **E., and Ayliffe, M.** (2017). The *Lr34* adult plant rust resistance gene provides  
882 seedling resistance in durum wheat without senescence. *Plant Biotechnol. J.* **15**:  
883 894–905.
- 884 **Risk, J.M., Selter, L.L., Krattinger, S.G., Viccars, L.A., Richardson, T.M., Buesing,**  
885 **G., Herren, G., Lagudah, E.S., and Keller, B.** (2012). Functional variability of  
886 the *Lr34* durable resistance gene in transgenic wheat. *Plant Biotechnol. J.* **10**:  
887 477–487.

- 888 **Sawers, R.J.H., Viney, J., Farmer, P.R., Bussey, R.R., Olsefski, G., Anufrikova, K.,**  
889 **Hunter, C.N., and Brutnell, T.P.** (2006). The maize *Oil Yellow1* gene encodes  
890 the I subunit of magnesium chelatase. *Plant Mol. Biol.* **60**: 95–106.
- 891 **Sindhu, A., Chintamanani, S., Brandt, A.S., Zanis, M., Scofield, S.R., and Johal,**  
892 **G.S.** (2008). A guardian of grasses: Specific origin and conservation of a unique  
893 disease-resistance gene in the grass lineage. *Proc. Natl. Acad. Sci. U. S. A.* **105**:  
894 1762–1767.
- 895 **Song, W.-Y., Wang, G.-L., Chen, L.-L., Kim, H.-S., Pi, L.-Y., Holsten, T., Gardner,**  
896 **J., Wang, B., Zhai, W.-X., Zhu, L.-H., Fauquet, C., and Ronald, P.** (1995). A  
897 receptor kinase-like protein encoded by the rice disease resistance gene, *Xa21*.  
898 *Science* **270**: 1804–1806.
- 899 **Ullstrup, A.J.** (1944). Further studies on a species of *Helminthosporium* parasitizing  
900 Corn. *Phytopathology* **34**: 214–222.
- 901 **Walson, J.L. and Berkley, J.A.** (2018). The impact of malnutrition on childhood  
902 infections. *Curr. Opin. Infect. Dis.* **Publish Ahead of Print**.
- 903 **Whalen, M.C.** (2005). Host defence in a developmental context. *Mol. Plant Pathol.* **6**:  
904 347–360.
- 905 **Zhang, L., Peek, A.S., Dunams, D., and Gaut, B.S.** (2002). Population genetics of  
906 duplicated disease-defense genes, *hm1* and *hm2*, in maize (*Zea mays* ssp. *mays* L.)  
907 and its wild ancestor (*Zea mays* ssp. *parviglumis*). *Genetics* **162**: 851–860.
- 908

909 **FIGURE LEGENDS**

910 **Figure 1. Developmental onset of the adult plant resistance phenotype of *Hm1<sup>A</sup>*.**

911

912 (A) A seedling *Hm1<sup>A</sup>* leaf exhibiting susceptibility to *Cochliobolus carbonum* race 1  
913 (CCR1) at the 2-week age. (B) A 9-week old *Hm1<sup>A</sup>* leaf completely resistant to CCR1.  
914 (C) The disease/resistance phenotype of *Hm1<sup>A</sup>* plants homozygous and heterozygous  
915 (*Hm1<sup>A</sup>hm1<sup>Pr</sup>*) for the APR allele to CCR1 at weekly intervals from week-1 through week-  
916 10. Ratings were established by controls *Hm1<sup>B73</sup>Hm1<sup>B73</sup>* (rated 1 and resistant  
917 throughout) and *hm1<sup>Pr</sup>hm1<sup>Pr</sup>* (rated 10 and susceptible throughout). All *hm1* alleles were  
918 in the B73 genetic background. Error bars represent standard error calculated using R  
919 statistical package.

920

921 **Figure 2. Molecular characteristics of *Hm1<sup>A</sup>*.**

922

923 (A) Southern blot analysis of DNA of inbreds P8 (*Hm1<sup>A</sup>Hm1<sup>A</sup>*) and Pr1 (*Hm1<sup>Pr1</sup>Hm1<sup>Pr1</sup>*)  
924 demonstrating that *Hm1<sup>A</sup>* is a single copy gene. Sample genotypes (inbreds P8 or Pr1) are  
925 indicated below the restriction endonuclease used for DNA digestions (BamHI, EcoRI, or  
926 HindIII) and M corresponds to the DNA marker lane. (B) Schematic representation of the  
927 gene structure of *Hm1<sup>A</sup>* comprised by five exons (gray boxes) and four introns, identical  
928 to *Hm1<sup>B73</sup>*. The locations and the nature of five amino acids that differ between *HM1<sup>A</sup>*  
929 and *HM1<sup>B73</sup>* are indicated by red lines. The locations of the start and termination codons  
930 are also indicated.

931

932 **Figure 3. Transcriptional and biochemical activities of *Hm1<sup>A</sup>* during the seedling  
933 and mature stages.**

934

935 (A) Reverse transcription (RT)-PCR assay showing no change in *Hm1<sup>A</sup>* accumulation in  
936 leaves from week-1 through week-8 after planting. The *actin* gene was used as a control.  
937 (B) Quantitative real time PCR (qRT-PCR) measurements of the expression of *Hm1<sup>A</sup>* also  
938 demonstrates no change in *Hm1<sup>A</sup>* accumulation across the time period when APR is  
939 established. (C) *In vitro* HC-toxin reductase (HCTR) assays showing that the relative  
940 enzymatic activity encoded by *Hm1<sup>A</sup>* is less than *Hm1<sup>B73</sup>* but higher than *hm1<sup>Pr</sup>*, the null  
941 allele. The specific activity of HCTR varies between alleles but not over time between  
942 weeks 3 and 7 in any genotype. The HCTR assay was based on the determination via LC-  
943 MS/MS of the amount of HC-toxin reduced by leaf protein extracts from the leaves of all  
944 genotypes. Different letters indicate significant differences between genotypes ( $p_{adj} <$   
945 0.05).

946

947 **Figure 4. Design of the targeted EMS mutagenesis screen to generate new mutant  
948 alleles of *Hm1*.**

949

950 Pollen collected from the fully resistant inbred B73 (*Hm1<sup>B73</sup>Hm1<sup>B73</sup>*) was treated with  
951 ethyl methanesulfonate (EMS) and used to pollinate ears of the fully susceptible inbred  
952 Pr (*hm1<sup>Pr</sup>hm1<sup>Pr</sup>*) in a greenhouse. The resultant M1 seeds (*Hm1<sup>B73</sup>/hm1<sup>Pr</sup>*) were planted in  
953 the field, inoculated with CCR1, and screened for disease resistance at both the seedling  
954 stage and at maturity to identify rare susceptible mutants, designated as *Hm1<sup>B73\*</sup>/hm1<sup>Pr</sup>*.

955 M1 mutants that were susceptible at the seedling stage that became resistant with the  
956 progression of age were considered APR. Out of about 4,500 M1 plants screened, 7  
957 susceptible mutants were found and two became resistant at maturity.

958

959 **Figure 5. Relative strength of the three APR alleles of *hm1* in conferring protection**  
960 **against CCR1.**

961

962 Like *Hm1<sup>A</sup>*, both new APR alleles (*Hm1-3* and *Hm1-4*) were introgressed into B73 for six  
963 generations for comparison of their resistance phenotypes. Plants homozygous for the  
964 *Hm1<sup>B73</sup>* and *hm1-2* alleles were fully resistant and susceptible, respectively. Disease  
965 resistance was evaluated three times, at week-2, week-5 and week-9 after planting, and a  
966 scale of 1 (completely resistant) to 10 (completely susceptible) was used to rate the  
967 interaction phenotypes. Letters represent whether differences among each age group were  
968 significant ( $p_{\text{adj}} < 0.05$ ). The relative order of strength observed was  $Hm1^{B73} > Hm1-3 >$   
969  $Hm1^A > Hm1-4 > hm1-2$ .

970

971 **Figure 6. *In vitro* enzymatic activities of HCTRs encoded by the new APR alleles of**  
972 ***hm1*.**

973

974 Protein extracts from the leaf tissue of near-isogenic lines of the APR alleles *Hm1-3* and  
975 *Hm1-4* in the B73 background were used to conduct *in vitro* HCTR assays. The fully  
976 resistant (*Hm1<sup>B73</sup>*) and susceptible (*hm1-2*) alleles of *hm1* were used as controls. HCTR  
977 activities, measured at age week-3 and week-7, relied on to determining the amount of  
978 HC-toxin reduced via LC-MS/MS. Letters represent whether differences among each age  
979 group were significant ( $p_{\text{adj}} < 0.05$ ).

980

981 **Figure 7. Resistance of *Hm1<sup>A</sup>* seedlings to CCR1 in increased by extended**  
982 **photoperiod.**

983

984 Two-week-old homozygous *Hm1<sup>A</sup>* seedlings were inoculated with CCR1 and incubated  
985 under two different photoperiods of 12 h daylight (12 h L:12 h D) and 18 h daylight (18 h  
986 L:6 h D). *Hm1<sup>A</sup>* seedlings grown under 12 h daylight were susceptible to CCR1 at 72 hpi  
987 (A) and 96 hpi (B). *Hm1<sup>A</sup>* seedlings incubated under the extended photoperiod of 18 h  
988 light exhibited notably enhanced resistance at both 72 hpi (C) and 96 hpi (D).

989

990 **Figure 8. Decreased photoperiod and photosynthesis inhibition by DCMU enhanced**  
991 **the susceptibility of APR genotypes to CCR1.**

992

993 (A) Two-week-old homozygous *Hm1<sup>A</sup>* and *Hm1-3* B73 NIL plants were inoculated with  
994 CCR1 and incubated with a shortened photoperiod of 4:20 L:D or longer 14:10 L:D  
995 photoperiod. Plants grown under a decreased photoperiod were completely susceptible to  
996 CCR1 while control plants were relatively less susceptible. (B) *Hm1<sup>A</sup>* and *Hm1-3* B73  
997 NIL plants were grown for two-weeks in the longer photoperiod conditions (14:10 L:D)  
998 and half of the plants were sprayed with DCMU, a photosynthesis inhibiting herbicide.  
999 Application of DCMU rendered both *Hm1<sup>A</sup>* and *Hm1-3* plants highly susceptible to  
1000 CCR1 compared to control plants. Pictures were taken 6 days after inoculation.

1001 **TABLES**

1002 **Table 1. The nature of molecular changes in the mutant alleles of *Hm1* generated by**  
1003 **mutagenesis and their respective disease/resistance phenotypes to infection by**  
1004 **CCR1 at maturity.**

1005



Fig. 1

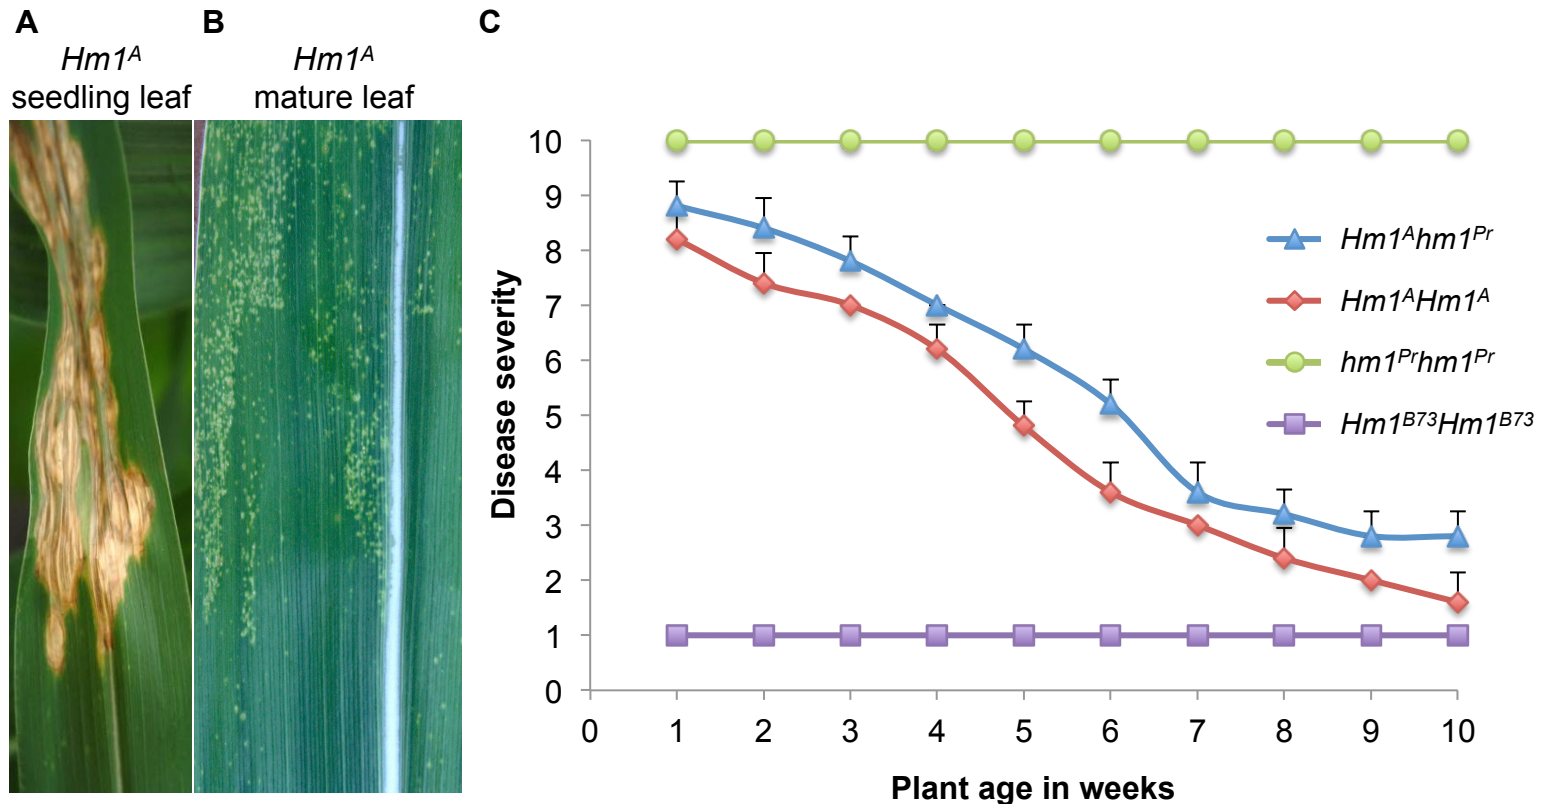

**Figure 1. Developmental onset of the adult plant resistance phenotype of *Hm1<sup>A</sup>*.**

(A) A seedling *Hm1<sup>A</sup>* leaf exhibiting susceptibility to *Cochliobolus carbonum* race 1 (CCR1) at the 2-week age. (B) A 9-week old *Hm1<sup>A</sup>* leaf completely resistant to CCR1. (C) The disease/resistance phenotype of *Hm1<sup>A</sup>* plants homozygous and heterozygous (*Hm1<sup>A</sup>hm1<sup>Pr</sup>*) for the APR allele to CCR1 at weekly intervals from week-1 through week-10. Ratings were established by controls *Hm1<sup>B73</sup>Hm1<sup>B73</sup>* (rated 1 and resistant throughout) and *hm1<sup>Pr</sup>hm1<sup>Pr</sup>* (rated 10 and susceptible throughout). All *hm1* alleles were in the B73 genetic background. Error bars represent standard error calculated using R statistical package.

Fig. 2

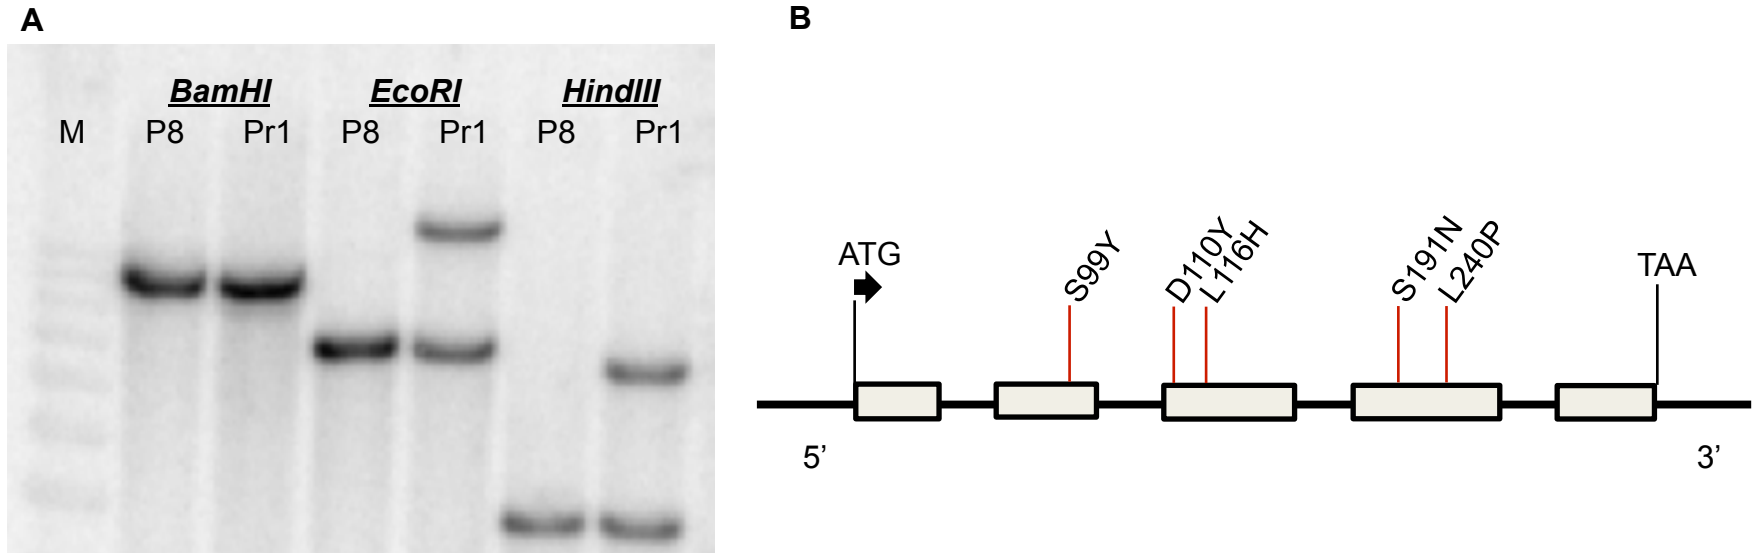

**Figure 2. Molecular characteristics of *Hm1<sup>A</sup>*.**

(A) Southern blot analysis of DNA of inbreds P8 (*Hm1<sup>A</sup>Hm1<sup>A</sup>*) and Pr1 (*Hm1<sup>Pr1</sup>Hm1<sup>Pr1</sup>*) demonstrating that *Hm1<sup>A</sup>* is a single copy gene. Sample genotypes (inbreds P8 or Pr1) are indicated below the restriction endonuclease used for DNA digestions (*Bam*HI, *Eco*RI, or *Hind*III) and M corresponds to the the DNA marker lane. (B) Schematic representation of the gene structure of *Hm1<sup>A</sup>* comprised by five exons (grey boxes) and four introns, identical to *Hm1<sup>B73</sup>*. The locations and the nature of five amino acids that differ between *HM1<sup>A</sup>* and *HM1<sup>B73</sup>* are indicated by red lines. The locations of the start and termination codons are also indicated.

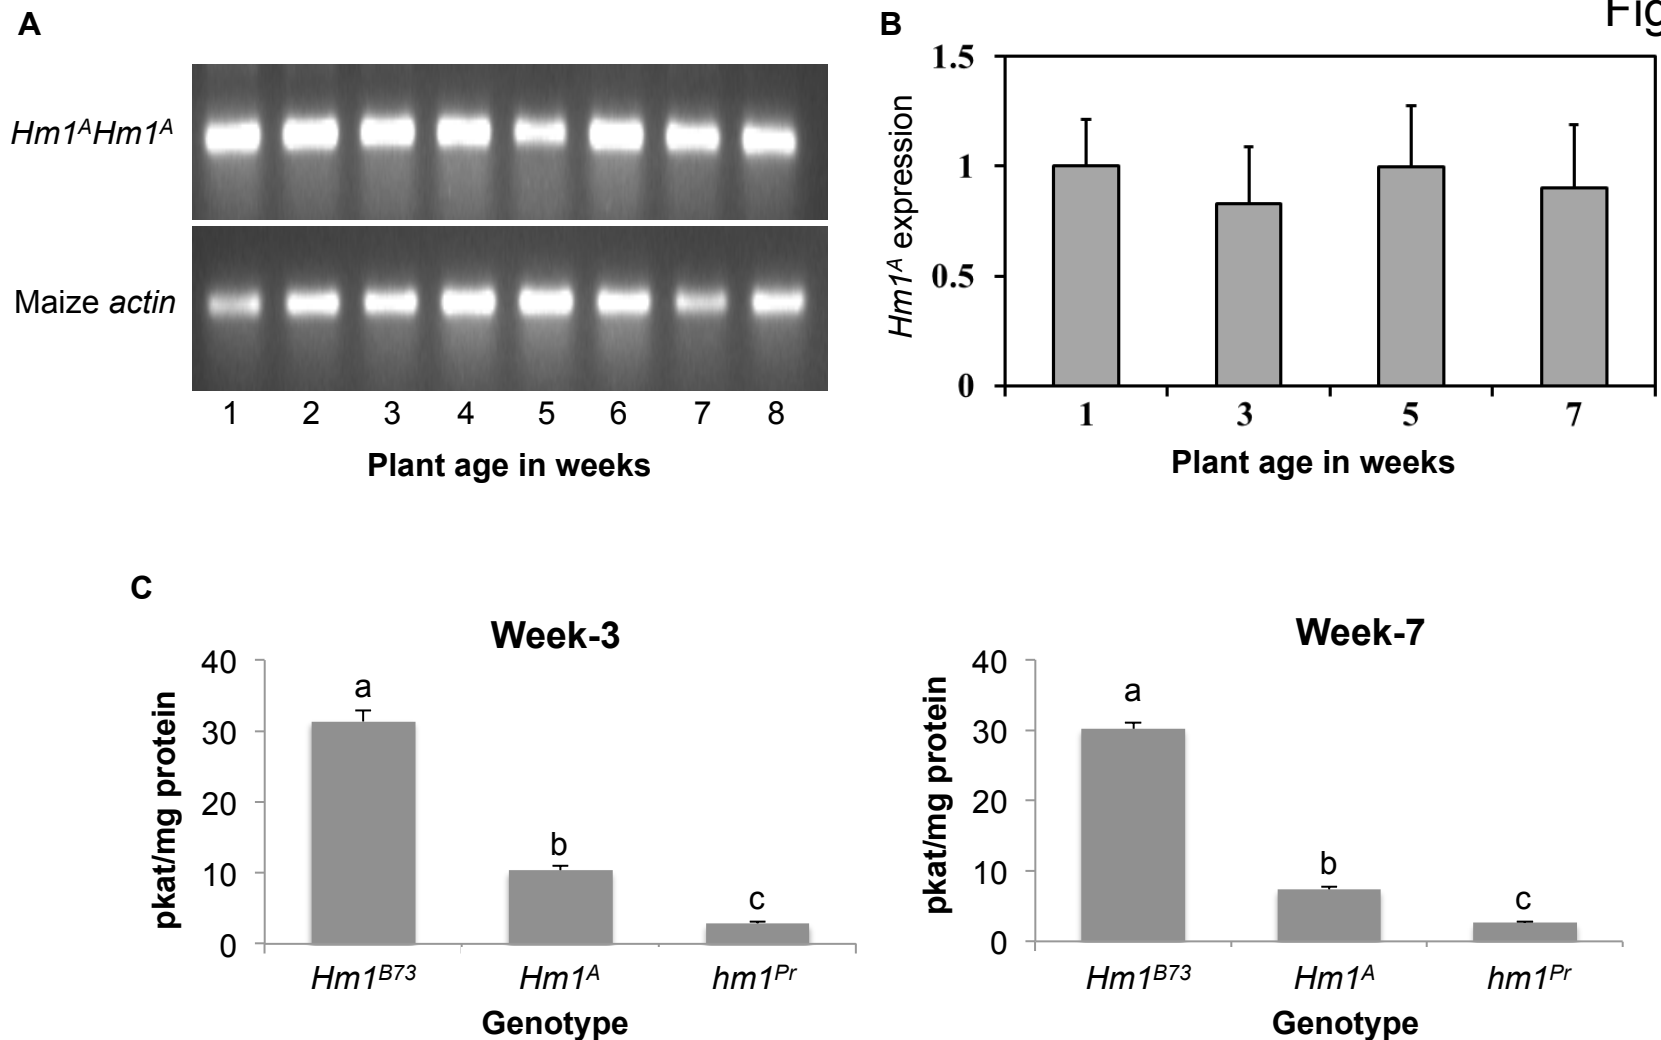

**Figure 3. Transcriptional and biochemical activities of *Hm1<sup>A</sup>* during the seedling and mature stages.**

(A) Reverse transcription (RT)-PCR assay showing no change in *Hm1<sup>A</sup>* accumulation in leaves from week-1 through week-8 after planting. The *actin* gene was used as a control. (B) Quantitative real time PCR (qRT-PCR) measurements of the expression of *Hm1<sup>A</sup>* also demonstrates no change in *Hm1<sup>A</sup>* accumulation across the time period when APR is established. (C) *In vitro* HC-toxin reductase (HCTR) assays showing that the relative enzymatic activity encoded by *Hm1<sup>A</sup>* is less than *Hm1<sup>B73</sup>* but higher than *hm1<sup>Pr</sup>*, the null allele. The specific activity of HCTR varies between alleles but not over time between weeks 3 and 7 in any genotype. The HCTR assay was based on the determination via LC-MS/MS of the amount of HC-toxin reduced by leaf protein extracts from the leaves of all genotypes. Different letters indicate significant differences between genotypes ( $p_{\text{adj}} < 0.05$ ).

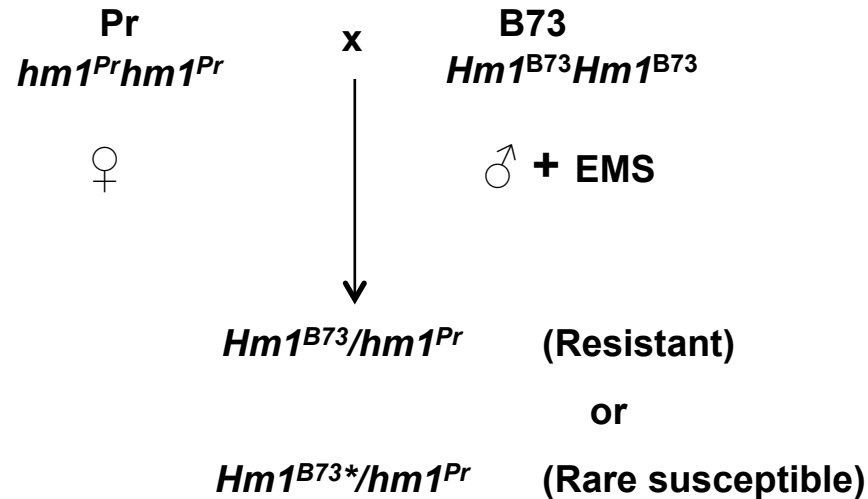

**Figure 4. Design of the targeted EMS mutagenesis screen to generate new mutant alleles of *Hm1*.**

Pollen collected from the fully resistant inbred B73 (*Hm1<sup>B73</sup>Hm1<sup>B73</sup>*) was treated with ethyl methanesulfonate (EMS) and used to pollinate ears of the fully susceptible inbred Pr (*hm1<sup>Pr</sup>hm1<sup>Pr</sup>*) in a greenhouse. The resultant M<sub>1</sub> seeds (*Hm1<sup>B73</sup>/hm1<sup>Pr</sup>*) were planted in the field, inoculated with CCR1, and screened for disease resistance at both the seedling stage and at maturity to identify rare susceptible mutants, designated as *Hm1<sup>B73\*</sup>/hm1<sup>Pr</sup>*. M<sub>1</sub> mutants that were susceptible at the seedling stage that became resistant with the progression of age were considered APR. Out of about 4,500 M<sub>1</sub> plants screened, 7 susceptible mutants were found and two became resistant at maturity.

**Table 1. The nature of molecular changes in the mutant alleles of *Hm1* generated by mutagenesis and their respective disease/resistance phenotypes to infection by CCR1 at maturity.**

| <b>Allele No.</b> | <b>Disease Response</b> | <b>Mutation</b> |
|-------------------|-------------------------|-----------------|
| <i>Hm1-3</i>      | APR                     | T90M            |
| <i>Hm1-4</i>      | APR                     | V210M           |
| <i>hm1-5</i>      | Null                    | C82Y            |
| <i>hm1-6</i>      | Null                    | Nonsense        |
| <i>hm1-7</i>      | Null                    | Nonsense        |
| <i>hm1-8</i>      | Null                    | Nonsense        |
| <i>hm1-9</i>      | Null                    | Nonsense        |

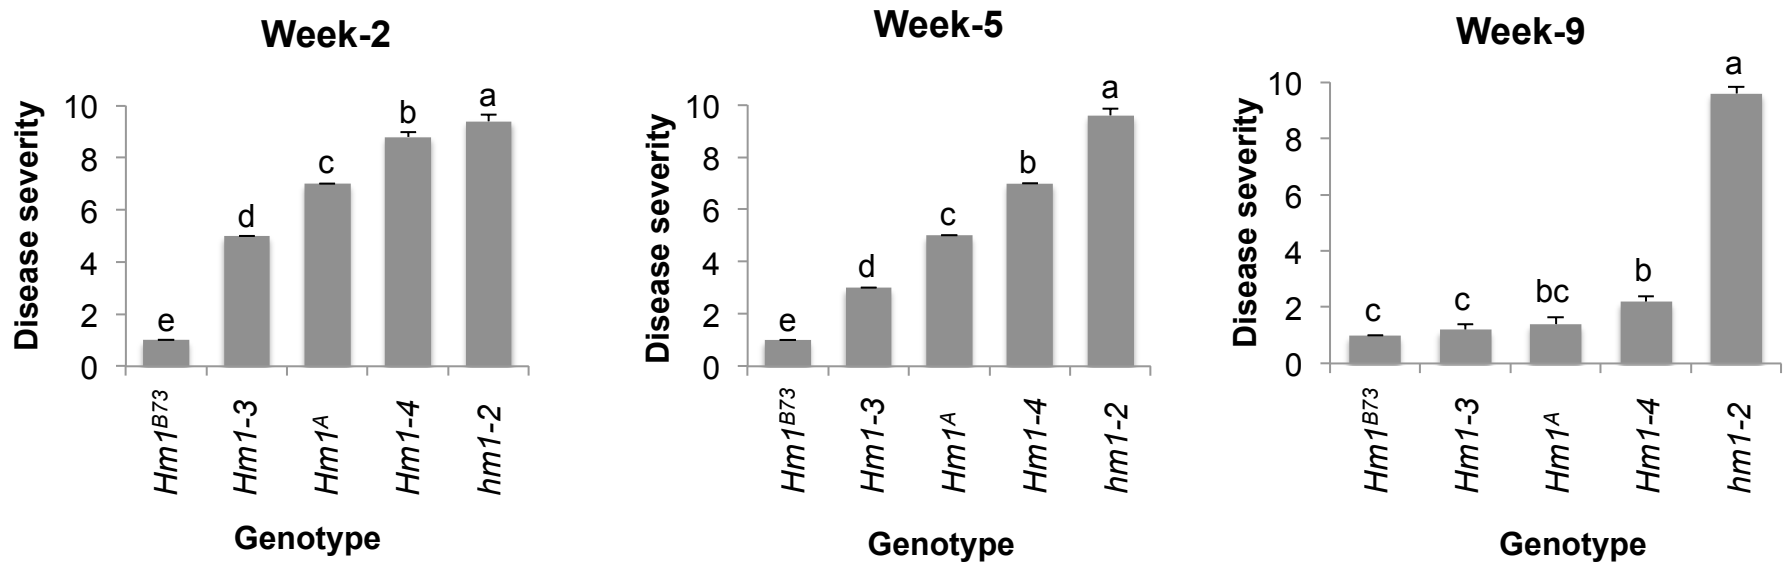

**Figure 5. Relative strength of the three APR alleles of *hml* in conferring protection against CCR1.**

Like *Hm1<sup>A</sup>*, both new APR alleles (*Hm1-3* and *Hm1-4*) were introgressed into B73 for six generations for comparison of their resistance phenotypes. Plants homozygous for the *Hm1<sup>B73</sup>* and *hm1-2* alleles were fully resistant and susceptible, respectively. Disease resistance evaluations were done three times, at week-2, week-5 and week-9 after planting, and a scale of 1 (completely resistant) to 10 (completely susceptible) was used to rate the interaction phenotypes. Letters represent whether differences among each age group were significant ( $p_{adj} < 0.05$ ). The relative order of strength observed was *Hm1<sup>B73</sup>* > *Hm1-3* > *Hm1<sup>A</sup>* > *Hm1-4* > *hm1-2*.



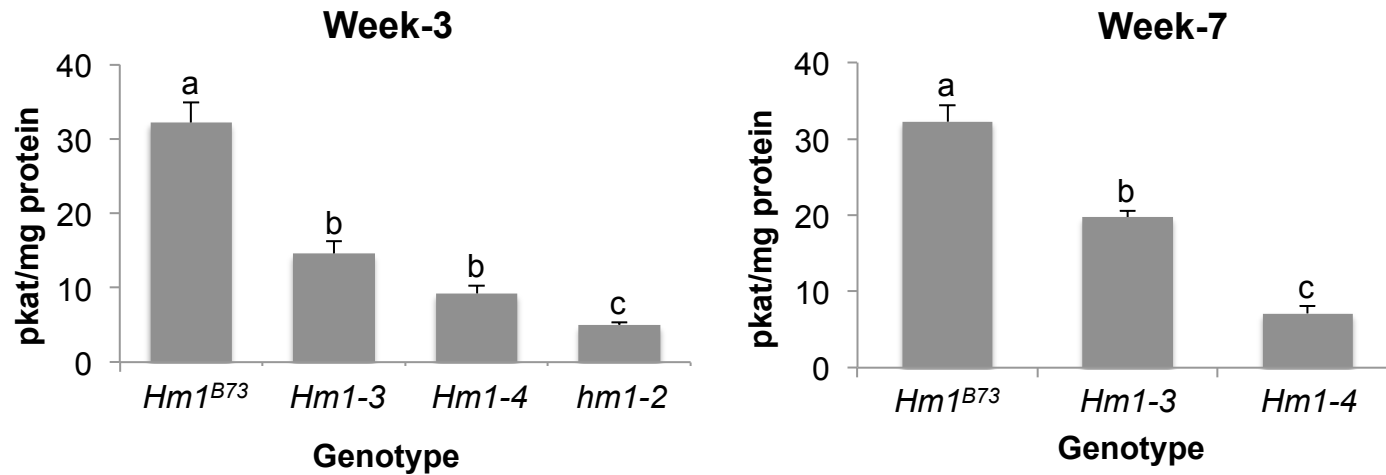

**Figure 6. *In vitro* enzymatic activities of HCTRs encoded by the new APR alleles of *hm1*.**

Protein extracts from the leaf tissue of near-isogenic lines of the APR alleles *Hm1-3* and *Hm1-4* in the B73 background were used to conduct *in vitro* HCTR assays. The fully resistant (*Hm1<sup>B73</sup>*) and susceptible (*hm1-2*) alleles of *hm1* were used as controls. HCTR activities, measured at age week-3 and week-7, relied on to determining the amount of HC-toxin reduced via LC-MS/MS. Letters represent whether differences among each age group were significant ( $p_{\text{adj}} < 0.05$ ).

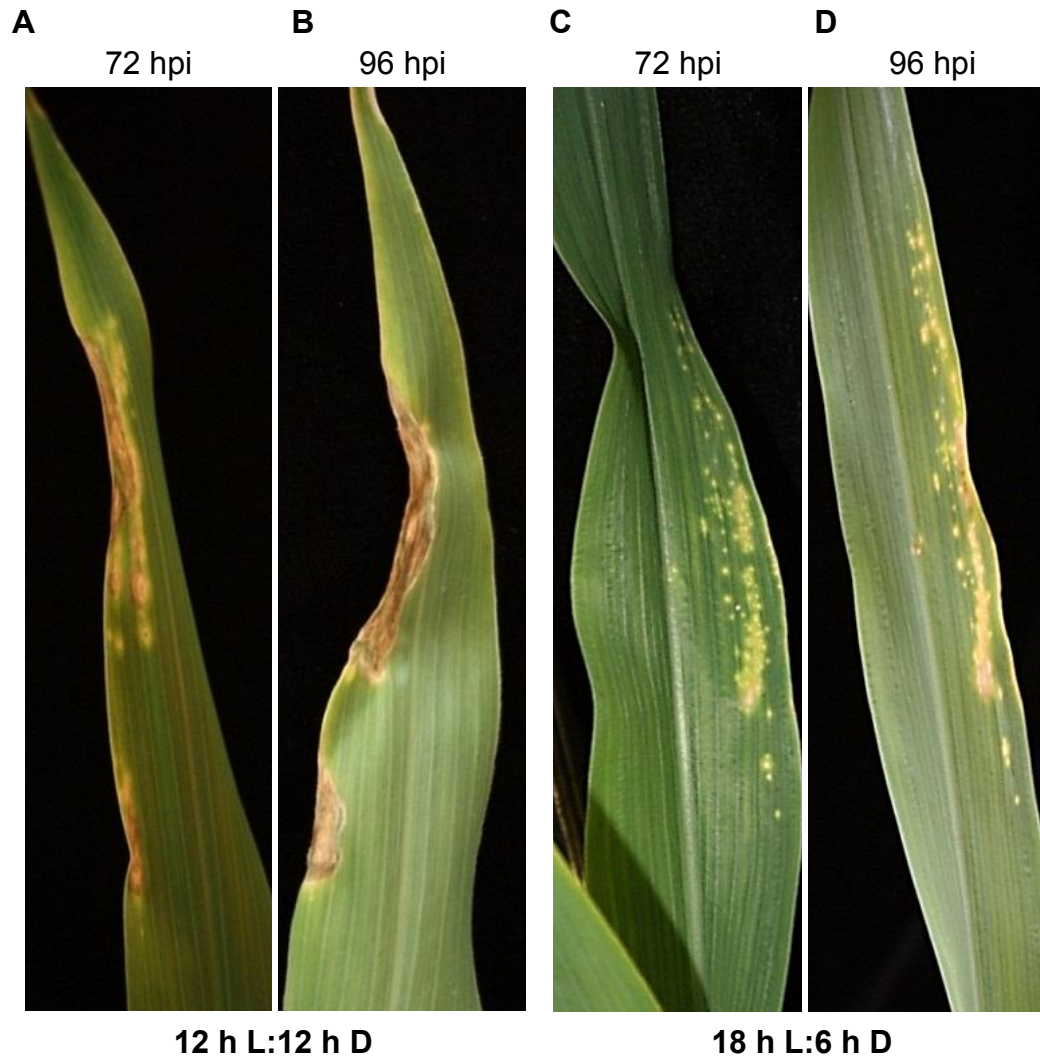

**Figure 7. Resistance of *Hm1<sup>A</sup>* seedlings to CCR1 in increased by extended photoperiod.**

Two-week-old homozygous *Hm1<sup>A</sup>* seedlings were inoculated with CCR1 and incubated under two different photoperiods of 12 h daylight (12 h L:12 h D) and 18 h daylight (18 h L:6 h D). *Hm1<sup>A</sup>* seedlings grown under 12 h daylight were susceptible to CCR1 at 72 hpi (A) and 96 hpi (B). *Hm1<sup>A</sup>* seedlings incubated under the extended photoperiod of 18 h light exhibited notably enhanced resistance at both 72 hpi (C) and 96 hpi (D).

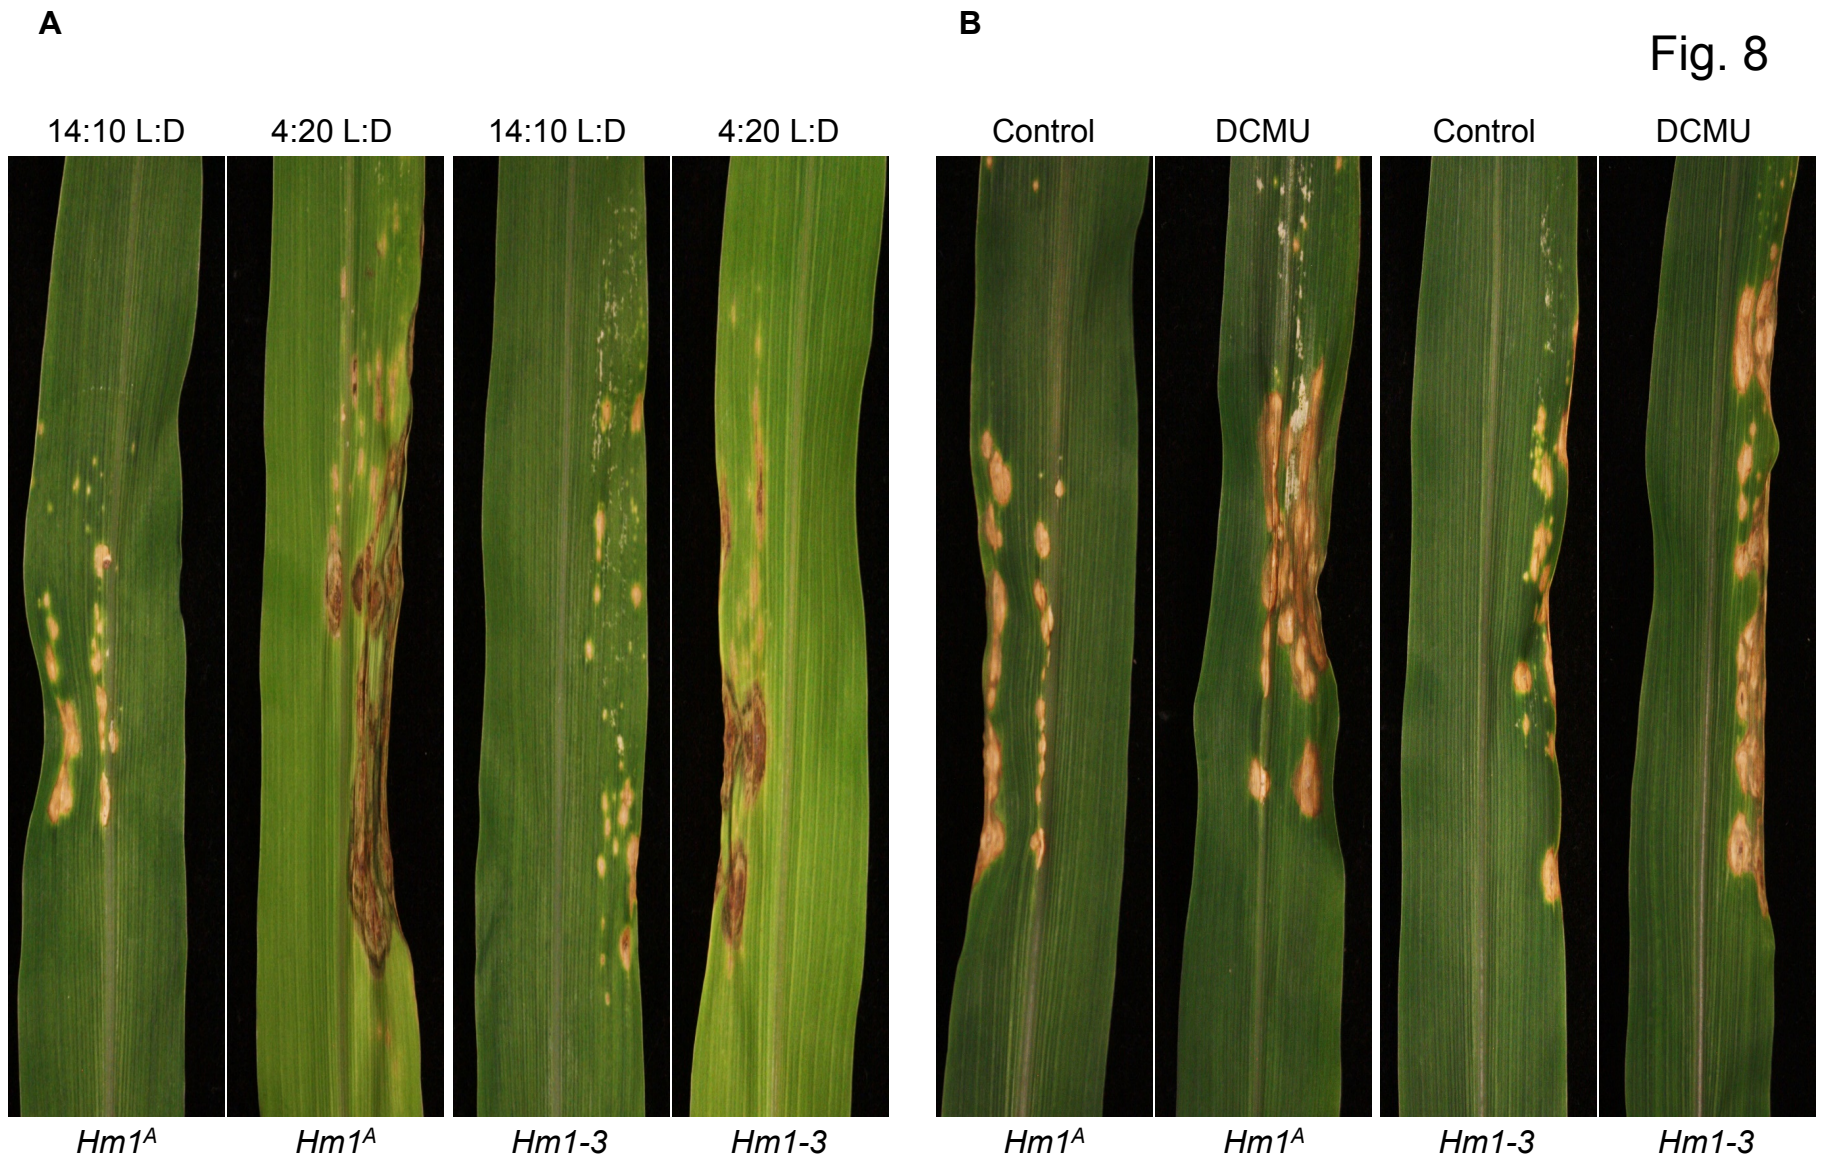

**Figure 8. Decreased photoperiod and photosynthesis inhibition by DCMU enhanced the susceptibility of APR genotypes to CCR1.**

(A) Two-week-old homozygous *Hm1<sup>A</sup>* and *Hm1-3* B73 NIL plants were inoculated with CCR1 and incubated with a shortened photoperiod of 4:20 L:D or longer 14:10 L:D photoperiod. Plants grown under a decreased photoperiod were completely susceptible to CCR1 while control plants were relatively less susceptible. (B) *Hm1<sup>A</sup>* and *Hm1-3* B73 NIL plants were grown for two-weeks in the longer photoperiod conditions (14:10 L:D) and half of the plants were sprayed with DCMU, a photosynthesis inhibiting herbicide. Application of DCMU rendered both *Hm1<sup>A</sup>* and *Hm1-3* plants highly susceptible to CCR1 compared to control plants. Pictures were taken 6 days after inoculation.
